# Supplementary material for: Transcriptome-Wide Identification of WRKY Transcription Factor and Functional Characterization of RgWRKY37 Involved in Acteoside Biosynthesis in Rehmannia glutinosa
Source: Front Plant Sci. 2021 Sep 29;12:739853. doi: 10.3389/fpls.2021.739853 (PMC8511629; doi:10.3389/fpls.2021.739853)
Supplement: Supplementary file 2 [file Data_Sheet_2.xlsx]

## Sheet: Table S1
Table S1. Primers used for qRT-PCR analyses.
Primer	Forward	Reverse	Amplicon size (bp)	Using
RgWRKY5q	TTTCAGCATTCCTCGTCCAC	ACCGGTTTATCTCCAGCAAC	173	qRT-PCR detectection
RgWRKY7q	TGTCCATGGCAAAGCAAGAA	AGTACCCTGCATTTGCTCAC	88	qRT-PCR detectection
RgWRKY13q	ACCAACAACAGTTCCCTGAC	AGTGATCTCAAGGCTCCTGT	81	qRT-PCR detectection
RgWRKY22q	GAAGAGAACAATTCGCGTGC	GCATCGTCGGATCATCGTTA	194	qRT-PCR detectection
RgWRKY23q	GAGCACATTCTTAGTCAGATGC	GGAAGCTAAGTCTGATTAAACCCA	146	qRT-PCR detectection
RgWRKY27q	GCGTTTAGAACGAAAACGGA	ACTGCATCCTCCATTTGAGC	129	qRT-PCR detectection
RgWRKY34q	TGCTCCTACTTGTCCAGTCA	TGCTCTCCTTCGTATGTTGC	84	qRT-PCR detectection
RgWRKY35q	ATTGGTCACCTGACAGACCA	CAAGTTGGGGCTAAAGAGCA	184	qRT-PCR detectection
RgWRKY37q	ATCTCCGGCAATCAAACAGG	ACATCACCCCCATGATCTGA	153	qRT-PCR detectection
RgTIP41q	TGGCTCAGAGTTGATGGAGTG	TCTCCAGCAGCTTTCTCGGA	105	qRT-PCR detectection
RgWRKY37-OE	ATGGCGTCTACTATACCCACTG	GCTAACTTAGGCTTCGAAATTC	922	Overexpression vector construction
RgWRKY37-Sub	ATGGCGTCTACTATACCCACTG	ACTTAGGCTTCGAAATTCAAGAA	918	Subcellular localization vector construction
pBI121-D	CACACTTGTCTACTCCAAAAAT	CACGAAAGTATGGTAATAGAAC	614	Transformation detection
rolB-D	GCTCTTGCAGTGCTAGATTT	GAAGGTGCAAGCTACCTCTC	423	Transformation detection
RgUGTq	CCTTGTCGTTCAACATCCCA	TCTGTGTAGCCTCATCACCA	156	qRT-PCR detectection
RgPPOq	CCAATACCTGGACCACCTTG	GAGTCGCGGACACTTTAGAA	183	qRT-PCR detectection
RgCuAOq	GTTCGTGTGACCGACGAAAG	CACAACTACGATCTCAGCCG	123	qRT-PCR detectection
Rg4CLq	GTCCTCGCCTTCACTATTCC	TCGTCTTGGTTGACTCGTTC	182	qRT-PCR detectection
RgHCTq	AAGAACACATCAAGCCCTCC	TCGGAGAGCGATTGTTTCAG	187	qRT-PCR detectection
RgTyDCq	CGAACAATCTCAACGCGAAG	CTGCACAACCTTCCATGCTA	158	qRT-PCR detectection

## Sheet: Table S2
Table S2. Differentially expressed of WRKY genes in R. glutinosa hairy root treated with SA and MeJA
Gene	SA0-vs-SA12						SA0-vs-SA24						MeJA0-vs-MeJA12						MeJA0-vs-MeJA24
	log2 Ratio(SA12/SA0)	Up-Down-Regulation(SA12/SA0)	P-value	FDR	Differential expressed genes		log2 Ratio(SA24/SA0)	Up-Down-Regulation(SA24/SA0)	P-value	FDR	Differential expressed genes		log2 Ratio(MeJ12/MeJ0)	Up-Down-Regulation(MeJ12/MeJ0)	P-value	FDR	Differential expressed genes		log2 Ratio(MeJ24/MeJ0)	Up-Down-Regulation(MeJ24/MeJ0)	P-value	FDR	Differential expressed genes
RgWRKY12	0.594257	Up	0.00027725	0.00220437			1.10962	Up	4.69e-14	1.23e-12	Yes		-0.171653	Down	0.26083	0.44324			-0.284909	Down	0.0771778	0.207505
RgWRKY5	0.908965	Up	0.00016868	0.00141655			1.24738	Up	3.35e-08	5.09e-07	Yes		-0.089005	Down	0.787842	0.870337			0.00307939	Up	0.99045	1.05
RgWRKY35	6.56705	Up	0	0	Yes		6.95209	Up	0	0	Yes		-3.10753	Down	0.000355028	0.00184547			-4.04041	Down	7.77e-05	0.000536633	Yes
RgWRKY37	2.3397	Up	0	0	Yes		2.75691	Up	0	0	Yes		-1.94946	Down	3.86e-37	1.5e-35	Yes		-2.67687	Down	2.42e-53	1.48e-51	Yes
RgWRKY22	1.34186	Up	0.000671984	0.0048546			1.67807	Up	4.98e-06	5.51e-05	Yes		-0.424083	Down	0.169585	0.34038			-2.11247	Down	7.89e-07	7.47e-06	Yes
RgWRKY7	1.22009	Up	1.23e-16	4.22e-15	Yes		-0.203045	Down	0.289994	0.525104			-0.803009	Down	0.00217818	0.00930535			-1.472	Down	8.92e-07	8.39e-06	Yes
RgWRKY9	0.690256	Up	0.015393	0.0677525			0.153279	Up	0.662224	0.802548			9.62571	Up	1.71e-30	5.47e-29	Yes		9.03342	Up	2.52e-20	6.58e-19	Yes
RgWRKY20	0.184402	Up	0.0402534	0.142139			0.476662	Up	2.27e-08	3.51e-07			-0.988252	Down	1.01e-18	2.08e-17			-1.16875	Down	5.97e-24	1.81e-22	Yes
RgWRKY18	0.163499	Up	0.73531	0.848552			0.536053	Up	0.206028	0.445899			-1.76867	Down	4.82e-06	3.48e-05	Yes		-2.03171	Down	4.78e-07	4.66e-06	Yes
RgWRKY25	-0.29019	Down	0.0101276	0.0481323			-0.565007	Down	1.17e-06	1.45e-05			-1.47309	Down	1.97e-21	4.53e-20	Yes		-0.343286	Down	0.00762332	0.0324356
RgWRKY23	1.54787	Up	2.93e-34	2.13e-32	Yes		0.457499	Up	0.00249306	0.0145941			1.79181	Up	3.44e-21	7.86e-20	Yes		0.918863	Up	3.39e-05	0.000250052
RgWRKY34	1.13572	Up	1.97e-05	0.000203219	Yes		-1.20532	Down	0.00254086	0.0148477			3.55135	Up	9.88e-46	4.63e-44	Yes		2.70326	Up	1.82e-20	4.79e-19	Yes
RgWRKY13	1.17591	Up	6.89e-05	0.000632879	Yes		2.21715	Up	1.25e-19	4.71e-18	Yes		-0.529534	Down	0.0466254	0.126423			-0.624344	Down	0.0216446	0.0772788
RgWRKY15	1.45925	Up	1.34e-11	3.12e-10	Yes		1.41279	Up	6.4e-11	1.3e-09	Yes		-1.84008	Down	1.32e-13	2.01e-12	Yes		-1.2296	Down	4.48e-08	4.97e-07	Yes
RgWRKY31	0.179946	Up	0.656662	0.799653			-1.09346	Down	0.0357568	0.127828			4.06312	Up	1.92e-38	7.73e-37	Yes		2.16993	Up	1.2e-06	1.11e-05	Yes
					8

## Sheet: Table S3
Table S3. Enriched signaling pathways of DGEs detected in three comparisons under H2O2 treated.
Comparison	Pathway	DEGseq_Method	All-gene (32771)	Pvalue	Qvalue	Pathway ID
Control-VS-H12	Biosynthesis of secondary metabolites	420	4097	1.94309e-14	2.54544e-12	ko01110
	Flavonoid biosynthesis	49	206	7.95348e-14	5.20953e-12	ko00941
	Phenylpropanoid biosynthesis	115	801	1.32554e-12	5.70307e-11	ko00940
	Flavone and flavonol biosynthesis	27	77	1.7414e-12	5.70307e-11	ko00944
	Stilbenoid, diarylheptanoid and gingerol biosynthesis	28	111	3.9549e-09	1.03618e-07	ko00945
	Metabolic pathways	640	7375	6.00954e-08	1.31208e-06	ko01100
	MAPK signaling pathway - plant	101	892	5.29554e-06	9.91023e-05	ko04016
	Pentose and glucuronate interconversions	64	502	7.60993e-06	0.000124613	ko00040
	Sesquiterpenoid and triterpenoid biosynthesis	24	127	1.26979e-05	0.000184825	ko00909
	Phenylalanine metabolism	29	184	6.10991e-05	0.000800399	ko00360
	Circadian rhythm - plant	41	302	7.77634e-05	0.000926092	ko04712
	Sphingolipid metabolism	31	207	9.30563e-05	0.00101586	ko00600
	Zeatin biosynthesis	16	79	0.000146514	0.00147641	ko00908
	Monoterpenoid biosynthesis	9	35	0.00067407	0.00630737	ko00902
	Isoflavonoid biosynthesis	16	100	0.00217119	0.0186111	ko00943
	Other glycan degradation	28	218	0.00227311	0.0186111	ko00511
	Carotenoid biosynthesis	22	159	0.00255554	0.0196927	ko00906
	Glutathione metabolism	30	255	0.00598386	0.0433647	ko00480
	Glycosphingolipid biosynthesis - ganglio series	14	92	0.00628954	0.0433647	ko00604
	Glucosinolate biosynthesis	5	18	0.00763609	0.0500164	ko00966
	Synthesis and degradation of ketone bodies	5	19	0.00975521	0.0608539	ko00072
	alpha-Linolenic acid metabolism	16	118	0.0110821	0.0659889	ko00592
	Cutin, suberine and wax biosynthesis	15	113	0.0163295	0.0930069	ko00073
	Indole alkaloid biosynthesis	16	125	0.0185086	0.0956142	ko00901
	Cysteine and methionine metabolism	38	370	0.0189426	0.0956142	ko00270
	Galactose metabolism	45	452	0.0189769	0.0956142	ko00052
	Tryptophan metabolism	24	215	0.023017	0.111675	ko00380
	Steroid biosynthesis	16	130	0.0258018	0.120716	ko00100
	Glycosaminoglycan degradation	15	120	0.0267278	0.120736	ko00531
	Starch and sucrose metabolism	81	914	0.034476	0.150545	ko00500
	Tyrosine metabolism	23	229	0.0696934	0.294511	ko00350
	Benzoxazinoid biosynthesis	6	41	0.072986	0.298786	ko00402
	Glycosphingolipid biosynthesis - globo and isoglobo series	5	32	0.0779819	0.309564	ko00603
	Cyanoamino acid metabolism	43	479	0.0851918	0.328239	ko00460
	ABC transporters	36	397	0.0965611	0.361414	ko02010
	Plant hormone signal transduction	79	959	0.126178	0.459149	ko04075
	Glycerophospholipid metabolism	30	334	0.13049	0.462006	ko00564
	Photosynthesis - antenna proteins	5	38	0.137244	0.473131	ko00196
	Sulfur relay system	4	29	0.154483	0.518903	ko04122
	Selenocompound metabolism	10	98	0.171188	0.560642	ko00450
	Vitamin B6 metabolism	5	42	0.185051	0.591261	ko00750
	Amino sugar and nucleotide sugar metabolism	48	583	0.194522	0.606724	ko00520
	Glycosylphosphatidylinositol (GPI)-anchor biosynthesis	11	115	0.210293	0.640661	ko00563
	Ubiquinone and other terpenoid-quinone biosynthesis	15	166	0.221969	0.660862	ko00130
	Terpenoid backbone biosynthesis	19	220	0.244202	0.710899	ko00900
	Porphyrin and chlorophyll metabolism	15	171	0.256706	0.723538	ko00860
	Caffeine metabolism	1	4	0.25959	0.723538	ko00232
	Phosphatidylinositol signaling system	25	301	0.265622	0.724925	ko04070
	Linoleic acid metabolism	7	73	0.275962	0.730152	ko00591
	Thiamine metabolism	6	61	0.278684	0.730152	ko00730
	Anthocyanin biosynthesis	3	28	0.330687	0.849412	ko00942
	Butanoate metabolism	6	70	0.396102	0.997872	ko00650
	Glycolysis / Gluconeogenesis	37	494	0.438848	1	ko00010
	Glycerolipid metabolism	32	426	0.439988	1	ko00561
	Mannose type O-glycan biosynthesis	1	8	0.451814	1	ko00515
	Ether lipid metabolism	11	142	0.453038	1	ko00565
	Folate biosynthesis	10	129	0.458624	1	ko00790
	Valine, leucine and isoleucine biosynthesis	5	62	0.469087	1	ko00290
	C5-Branched dibasic acid metabolism	2	22	0.479868	1	ko00660
	Inositol phosphate metabolism	19	257	0.496202	1	ko00562
	Basal transcription factors	10	133	0.49777	1	ko03022
	Ascorbate and aldarate metabolism	30	417	0.54129	1	ko00053
	Phenylalanine, tyrosine and tryptophan biosynthesis	13	181	0.552813	1	ko00400
	Propanoate metabolism	7	98	0.570403	1	ko00640
	Diterpenoid biosynthesis	7	99	0.581324	1	ko00904
	Fatty acid elongation	9	128	0.585091	1	ko00062
	RNA polymerase	21	302	0.608096	1	ko03020
	Peroxisome	25	360	0.615026	1	ko04146
	Fatty acid degradation	16	234	0.630161	1	ko00071
	Brassinosteroid biosynthesis	2	30	0.64942	1	ko00905
	RNA degradation	33	482	0.656307	1	ko03018
	Taurine and hypotaurine metabolism	2	31	0.667213	1	ko00430
	Biotin metabolism	3	48	0.68492	1	ko00780
	Pantothenate and CoA biosynthesis	5	81	0.706292	1	ko00770
	Isoquinoline alkaloid biosynthesis	10	159	0.72191	1	ko00950
	Other types of O-glycan biosynthesis	4	68	0.734559	1	ko00514
	Glycine, serine and threonine metabolism	15	236	0.735705	1	ko00260
	Ribosome biogenesis in eukaryotes	19	297	0.744358	1	ko03008
	Arginine and proline metabolism	14	223	0.747033	1	ko00330
	Monobactam biosynthesis	2	37	0.759015	1	ko00261
	Tropane, piperidine and pyridine alkaloid biosynthesis	7	120	0.773714	1	ko00960
	beta-Alanine metabolism	12	198	0.777511	1	ko00410
	Protein processing in endoplasmic reticulum	66	994	0.786841	1	ko04141
	Proteasome	8	139	0.795921	1	ko03050
	Sulfur metabolism	7	124	0.801682	1	ko00920
	Purine metabolism	43	670	0.815862	1	ko00230
	Fructose and mannose metabolism	10	179	0.841856	1	ko00051
	Valine, leucine and isoleucine degradation	12	215	0.860194	1	ko00280
	Cholesterol metabolism	1	28	0.878113	1	ko04979
	Photosynthesis	5	105	0.884687	1	ko00195
	Nitrogen metabolism	5	106	0.889492	1	ko00910
	Fatty acid biosynthesis	8	158	0.892351	1	ko00061
	Biosynthesis of unsaturated fatty acids	3	71	0.895758	1	ko01040
	Endocytosis	50	810	0.897157	1	ko04144
	N-Glycan biosynthesis	8	161	0.903393	1	ko00510
	Nicotinate and nicotinamide metabolism	11	211	0.903523	1	ko00760
	Ubiquitin mediated proteolysis	33	560	0.910046	1	ko04120
	One carbon pool by folate	1	33	0.916314	1	ko00670
	Riboflavin metabolism	1	34	0.922378	1	ko00740
	Protein export	7	150	0.923574	1	ko03060
	Pyrimidine metabolism	32	555	0.927908	1	ko00240
	Lysine biosynthesis	1	35	0.928002	1	ko00300
	Base excision repair	7	152	0.929416	1	ko03410
	Pyruvate metabolism	19	355	0.936135	1	ko00620
	Autophagy - other	3	82	0.941939	1	ko04136
	SNARE interactions in vesicular transport	3	83	0.945023	1	ko04130
	Plant-pathogen interaction	69	1146	0.956143	1	ko04626
	Arachidonic acid metabolism	5	132	0.96625	1	ko00590
	Pentose phosphate pathway	10	225	0.967761	1	ko00030
	Citrate cycle (TCA cycle)	11	245	0.970502	1	ko00020
	mRNA surveillance pathway	33	625	0.980248	1	ko03015
	Alanine, aspartate and glutamate metabolism	7	183	0.981239	1	ko00250
	Histidine metabolism	4	125	0.982727	1	ko00340
	Spliceosome	39	737	0.986632	1	ko03040
	2-Oxocarboxylic acid metabolism	22	459	0.987272	1	ko01210
	Carbon metabolism	51	956	0.993029	1	ko01200
	Nucleotide excision repair	10	263	0.993184	1	ko03420
	Fatty acid metabolism	10	269	0.994752	1	ko01212
	Aminoacyl-tRNA biosynthesis	10	270	0.994978	1	ko00970
	Lysine degradation	6	194	0.995824	1	ko00310
	Glyoxylate and dicarboxylate metabolism	11	295	0.996111	1	ko00630
	Carbon fixation in photosynthetic organisms	11	300	0.996873	1	ko00710
	Biosynthesis of amino acids	58	1103	0.997009	1	ko01230
	RNA transport	39	798	0.997446	1	ko03013
	Arginine biosynthesis	12	349	0.999162	1	ko00220
	Ribosome	56	1145	0.999588	1	ko03010
	Phagosome	10	335	0.999765	1	ko04145
	Oxidative phosphorylation	15	482	0.999971	1	ko00190
	Mismatch repair	2	175	0.999972	1	ko03430
	DNA replication	3	224	0.999992	1	ko03030
	Homologous recombination	4	350	1	1	ko03440
Control-VS-H24	Flavone and flavonol biosynthesis	24	77	1.001e-13	1.26125e-11	ko00944
	Flavonoid biosynthesis	33	206	1.38004e-09	8.69426e-08	ko00941
	Pentose and glucuronate interconversions	52	502	2.25108e-07	9.45453e-06	ko00040
	Phenylpropanoid biosynthesis	71	801	7.05286e-07	2.22165e-05	ko00940
	Stilbenoid, diarylheptanoid and gingerol biosynthesis	17	111	2.36549e-05	0.000505068	ko00945
	Biosynthesis of secondary metabolites	252	4097	2.49326e-05	0.000505068	ko01110
	Metabolic pathways	423	7375	2.80594e-05	0.000505068	ko01100
	MAPK signaling pathway - plant	69	892	8.72498e-05	0.00137418	ko04016
	Sesquiterpenoid and triterpenoid biosynthesis	16	127	0.000418514	0.0058592	ko00909
	Steroid biosynthesis	16	130	0.000543969	0.00685401	ko00100
	Isoflavonoid biosynthesis	12	100	0.0031809	0.0364358	ko00943
	Plant hormone signal transduction	63	959	0.00861377	0.0904446	ko04075
	Vitamin B6 metabolism	6	42	0.0148311	0.143747	ko00750
	Tryptophan metabolism	18	215	0.0168712	0.15184	ko00380
	Zeatin biosynthesis	8	79	0.0366217	0.307623	ko00908
	Indole alkaloid biosynthesis	11	125	0.0396629	0.312345	ko00901
	Sphingolipid metabolism	16	207	0.0437437	0.324218	ko00600
	Diterpenoid biosynthesis	9	99	0.0498764	0.335728	ko00904
	Glycosylphosphatidylinositol (GPI)-anchor biosynthesis	10	115	0.0516484	0.335728	ko00563
	Glucosinolate biosynthesis	3	18	0.0532901	0.335728	ko00966
	alpha-Linolenic acid metabolism	10	118	0.059516	0.357096	ko00592
	Thiamine metabolism	6	61	0.073309	0.419861	ko00730
	Monoterpenoid biosynthesis	4	35	0.0866572	0.474731	ko00902
	Terpenoid backbone biosynthesis	15	220	0.113591	0.596355	ko00900
	Linoleic acid metabolism	6	73	0.140407	0.707652	ko00591
	Glycosphingolipid biosynthesis - ganglio series	7	92	0.156301	0.757459	ko00604
	Other glycan degradation	14	218	0.170743	0.775946	ko00511
	Cyanoamino acid metabolism	28	479	0.172432	0.775946	ko00460
	Phenylalanine metabolism	12	184	0.180156	0.782749	ko00360
	Taurine and hypotaurine metabolism	3	31	0.186982	0.785324	ko00430
	Glycosaminoglycan degradation	8	120	0.223699	0.904503	ko00531
	Synthesis and degradation of ketone bodies	2	19	0.232966	0.904503	ko00072
	Carotenoid biosynthesis	10	159	0.239688	0.904503	ko00906
	beta-Alanine metabolism	12	198	0.249862	0.904503	ko00410
	Amino sugar and nucleotide sugar metabolism	32	583	0.251251	0.904503	ko00520
	Ribosome biogenesis in eukaryotes	17	297	0.269468	0.943137	ko03008
	Base excision repair	9	152	0.313372	0.999972	ko03410
	Benzoxazinoid biosynthesis	3	41	0.317499	0.999972	ko00402
	Propanoate metabolism	6	98	0.33564	0.999972	ko00640
	Glutathione metabolism	14	255	0.34936	0.999972	ko00480
	Glycerophospholipid metabolism	18	334	0.349704	0.999972	ko00564
	Fatty acid biosynthesis	9	158	0.354125	0.999972	ko00061
	Ascorbate and aldarate metabolism	22	417	0.364985	0.999972	ko00053
	Peroxisome	19	360	0.378009	0.999972	ko04146
	Plant-pathogen interaction	57	1146	0.426899	0.999972	ko04626
	Brassinosteroid biosynthesis	2	30	0.428527	0.999972	ko00905
	Protein export	8	150	0.438105	0.999972	ko03060
	Butanoate metabolism	4	70	0.439211	0.999972	ko00650
	Porphyrin and chlorophyll metabolism	9	171	0.443926	0.999972	ko00860
	Glycosphingolipid biosynthesis - globo and isoglobo series	2	32	0.461568	0.999972	ko00603
	Circadian rhythm - plant	15	302	0.492439	0.999972	ko04712
	Nucleotide excision repair	13	263	0.505369	0.999972	ko03420
	Lysine biosynthesis	2	35	0.508951	0.999972	ko00300
	Starch and sucrose metabolism	44	914	0.530016	0.999972	ko00500
	Ether lipid metabolism	7	142	0.531956	0.999972	ko00565
	Tyrosine metabolism	11	229	0.550182	0.999972	ko00350
	Fatty acid degradation	11	234	0.579219	0.999972	ko00071
	Inositol phosphate metabolism	12	257	0.588467	0.999972	ko00562
	Glycine, serine and threonine metabolism	11	236	0.590608	0.999972	ko00260
	Folate biosynthesis	6	129	0.595182	0.999972	ko00790
	Basal transcription factors	6	133	0.624936	0.999972	ko03022
	Arginine and proline metabolism	10	223	0.639107	0.999972	ko00330
	Cutin, suberine and wax biosynthesis	5	113	0.64151	0.999972	ko00073
	Pentose phosphate pathway	10	225	0.65015	0.999972	ko00030
	Fatty acid metabolism	12	269	0.651242	0.999972	ko01212
	C5-Branched dibasic acid metabolism	1	22	0.663408	0.999972	ko00660
	Biotin metabolism	2	48	0.680729	0.999972	ko00780
	Selenocompound metabolism	4	98	0.702214	0.999972	ko00450
	Fatty acid elongation	5	128	0.745515	0.999972	ko00062
	Cholesterol metabolism	1	28	0.749922	0.999972	ko04979
	Pantothenate and CoA biosynthesis	3	81	0.756016	0.999972	ko00770
	Sulfur relay system	1	29	0.762005	0.999972	ko04122
	SNARE interactions in vesicular transport	3	83	0.770473	0.999972	ko04130
	N-Glycan biosynthesis	6	161	0.794471	0.999972	ko00510
	ABC transporters	16	397	0.803795	0.999972	ko02010
	One carbon pool by folate	1	33	0.804776	0.999972	ko00670
	Proteasome	5	139	0.806341	0.999972	ko03050
	Lysine degradation	7	194	0.83193	0.999972	ko00310
	Tropane, piperidine and pyridine alkaloid biosynthesis	4	120	0.83661	0.999972	ko00960
	Monobactam biosynthesis	1	37	0.839865	0.999972	ko00261
	RNA degradation	19	482	0.847024	0.999972	ko03018
	Photosynthesis - antenna proteins	1	38	0.847604	0.999972	ko00196
	DNA replication	8	224	0.851705	0.999972	ko03030
	Histidine metabolism	4	125	0.858848	0.999972	ko00340
	Biosynthesis of unsaturated fatty acids	2	71	0.86313	0.999972	ko01040
	Alanine, aspartate and glutamate metabolism	6	183	0.880677	0.999972	ko00250
	Galactose metabolism	17	452	0.88324	0.999972	ko00052
	Arachidonic acid metabolism	4	132	0.885605	0.999972	ko00590
	Isoquinoline alkaloid biosynthesis	5	159	0.886841	0.999972	ko00950
	Purine metabolism	26	670	0.896837	0.999972	ko00230
	Valine, leucine and isoleucine degradation	7	215	0.898529	0.999972	ko00280
	Ubiquitin mediated proteolysis	21	560	0.907125	0.999972	ko04120
	Cysteine and methionine metabolism	13	370	0.909872	0.999972	ko00270
	Glycerolipid metabolism	15	426	0.921779	0.999972	ko00561
	Pyruvate metabolism	12	355	0.926243	0.999972	ko00620
	Mismatch repair	5	175	0.928734	0.999972	ko03430
	2-Oxocarboxylic acid metabolism	16	459	0.933779	0.999972	ko01210
	Fructose and mannose metabolism	5	179	0.936766	0.999972	ko00051
	Sulfur metabolism	3	124	0.942067	0.999972	ko00920
	Aminoacyl-tRNA biosynthesis	8	270	0.951616	0.999972	ko00970
	Arginine biosynthesis	11	349	0.952163	0.999972	ko00220
	Valine, leucine and isoleucine biosynthesis	1	62	0.953607	0.999972	ko00290
	Phosphatidylinositol signaling system	9	301	0.956847	0.999972	ko04070
	Pyrimidine metabolism	19	555	0.957045	0.999972	ko00240
	Biosynthesis of amino acids	42	1103	0.957294	0.999972	ko01230
	Endocytosis	29	810	0.96548	0.999972	ko04144
	Other types of O-glycan biosynthesis	1	68	0.965544	0.999972	ko00514
	mRNA surveillance pathway	21	625	0.97119	0.999972	ko03015
	Phenylalanine, tyrosine and tryptophan biosynthesis	4	181	0.977181	0.999972	ko00400
	Spliceosome	25	737	0.977587	0.999972	ko03040
	Carbon metabolism	34	956	0.977618	0.999972	ko01200
	Carbon fixation in photosynthetic organisms	8	300	0.978684	0.999972	ko00710
	RNA polymerase	8	302	0.979861	0.999972	ko03020
	Citrate cycle (TCA cycle)	6	245	0.979965	0.999972	ko00020
	Glycolysis / Gluconeogenesis	15	494	0.981678	0.999972	ko00010
	Autophagy - other	1	82	0.982792	0.999972	ko04136
	Phagosome	8	335	0.99238	0.999972	ko04145
	Ribosome	39	1145	0.993036	0.999972	ko03010
	RNA transport	25	798	0.993356	0.999972	ko03013
	Photosynthesis	1	105	0.994504	0.999972	ko00195
	Nitrogen metabolism	1	106	0.99477	0.999972	ko00910
	Homologous recombination	8	350	0.995198	0.999972	ko03440
	Glyoxylate and dicarboxylate metabolism	6	295	0.9961	0.999972	ko00630
	Protein processing in endoplasmic reticulum	30	994	0.998426	0.999972	ko04141
	Oxidative phosphorylation	11	482	0.9987	0.999972	ko00190
	Nicotinate and nicotinamide metabolism	1	211	0.999972	0.999972	ko00760
Control-VS-H36	Flavonoid biosynthesis	58	206	2.05302e-17	2.6484e-15	ko00941
	Indole alkaloid biosynthesis	38	125	4.70706e-13	3.03605e-11	ko00901
	Phenylpropanoid biosynthesis	123	801	6.19439e-12	2.66359e-10	ko00940
	Flavone and flavonol biosynthesis	27	77	2.72254e-11	8.7802e-10	ko00944
	Biosynthesis of secondary metabolites	444	4097	5.7844e-11	1.49237e-09	ko01110
	Metabolic pathways	713	7375	6.0876e-08	1.30883e-06	ko01100
	MAPK signaling pathway - plant	114	892	1.09318e-06	2.01457e-05	ko04016
	Pentose and glucuronate interconversions	72	502	1.96749e-06	3.17258e-05	ko00040
	Stilbenoid, diarylheptanoid and gingerol biosynthesis	25	111	2.51884e-06	3.61033e-05	ko00945
	Sesquiterpenoid and triterpenoid biosynthesis	25	127	3.02662e-05	0.000390434	ko00909
	Glycosphingolipid biosynthesis - ganglio series	20	92	4.23354e-05	0.000496479	ko00604
	Circadian rhythm - plant	44	302	0.000124592	0.00133936	ko04712
	Sphingolipid metabolism	33	207	0.000155966	0.00154766	ko00600
	Other glycan degradation	34	218	0.000192349	0.00177236	ko00511
	Glycosaminoglycan degradation	22	120	0.000259441	0.00223119	ko00531
	Cutin, suberine and wax biosynthesis	20	113	0.000771066	0.00621672	ko00073
	Starch and sucrose metabolism	99	914	0.00229049	0.0165741	ko00500
	Glycerolipid metabolism	52	426	0.00231267	0.0165741	ko00561
	Carotenoid biosynthesis	24	159	0.00245137	0.0166435	ko00906
	alpha-Linolenic acid metabolism	19	118	0.00318965	0.0205732	ko00592
	Cyanoamino acid metabolism	55	479	0.00639772	0.0393003	ko00460
	Isoflavonoid biosynthesis	16	100	0.00687914	0.0393681	ko00943
	Terpenoid backbone biosynthesis	29	220	0.00701912	0.0393681	ko00900
	Fatty acid degradation	30	234	0.00909378	0.0488791	ko00071
	Zeatin biosynthesis	13	79	0.0111493	0.0575304	ko00908
	Glycosphingolipid biosynthesis - globo and isoglobo series	7	32	0.0130049	0.0645242	ko00603
	Synthesis and degradation of ketone bodies	5	19	0.0158228	0.0755976	ko00072
	Monoterpenoid biosynthesis	7	35	0.0209976	0.096739	ko00902
	Porphyrin and chlorophyll metabolism	22	171	0.0220977	0.0982968	ko00860
	Plant hormone signal transduction	94	959	0.0356745	0.1534	ko04075
	Glucosinolate biosynthesis	4	18	0.0535266	0.22274	ko00966
	Galactose metabolism	46	452	0.0703036	0.277211	ko00052
	Inositol phosphate metabolism	28	257	0.0711725	0.277211	ko00562
	Anthocyanin biosynthesis	5	28	0.0730635	0.277211	ko00942
	Glycerophospholipid metabolism	35	334	0.07548	0.278198	ko00564
	Glycosylphosphatidylinositol (GPI)-anchor biosynthesis	14	115	0.0847915	0.303836	ko00563
	Ascorbate and aldarate metabolism	42	417	0.0908236	0.315112	ko00053
	Brassinosteroid biosynthesis	5	30	0.0928238	0.315112	ko00905
	Steroid biosynthesis	15	130	0.108367	0.347786	ko00100
	Tryptophan metabolism	23	215	0.109416	0.347786	ko00380
	Amino sugar and nucleotide sugar metabolism	56	583	0.113023	0.347786	ko00520
	Benzoxazinoid biosynthesis	6	41	0.113233	0.347786	ko00402
	Thiamine metabolism	8	61	0.1212	0.36215	ko00730
	Vitamin B6 metabolism	6	42	0.123524	0.36215	ko00750
	Mannose type O-glycan biosynthesis	2	8	0.133848	0.383697	ko00515
	Fatty acid elongation	14	128	0.159556	0.447449	ko00062
	Propanoate metabolism	11	98	0.17392	0.477354	ko00640
	Fatty acid biosynthesis	16	158	0.217207	0.583743	ko00061
	Phosphatidylinositol signaling system	27	301	0.329936	0.837327	ko04070
	Peroxisome	32	360	0.330077	0.837327	ko04146
	Phenylalanine metabolism	17	184	0.331036	0.837327	ko00360
	ABC transporters	35	397	0.338533	0.839823	ko02010
	Folate biosynthesis	12	129	0.360241	0.876814	ko00790
	Photosynthesis - antenna proteins	4	38	0.375347	0.896662	ko00196
	Valine, leucine and isoleucine degradation	19	215	0.391097	0.917301	ko00280
	Glycolysis / Gluconeogenesis	42	494	0.410483	0.945577	ko00010
	Taurine and hypotaurine metabolism	3	31	0.468754	1	ko00430
	Ether lipid metabolism	12	142	0.491883	1	ko00565
	Pantothenate and CoA biosynthesis	7	81	0.493551	1	ko00770
	Tyrosine metabolism	19	229	0.502526	1	ko00350
	Butanoate metabolism	6	70	0.511062	1	ko00650
	beta-Alanine metabolism	16	198	0.552006	1	ko00410
	Diterpenoid biosynthesis	8	99	0.563168	1	ko00904
	Other types of O-glycan biosynthesis	5	68	0.659416	1	ko00514
	Sulfur relay system	2	29	0.696526	1	ko04122
	Linoleic acid metabolism	5	73	0.719752	1	ko00591
	Pyruvate metabolism	26	355	0.743758	1	ko00620
	Valine, leucine and isoleucine biosynthesis	4	62	0.754588	1	ko00290
	Basal transcription factors	9	133	0.765228	1	ko03022
	Fatty acid metabolism	19	269	0.774495	1	ko01212
	Riboflavin metabolism	2	34	0.777044	1	ko00740
	Lysine biosynthesis	2	35	0.790705	1	ko00300
	Fructose and mannose metabolism	12	179	0.798451	1	ko00051
	RNA polymerase	21	302	0.805867	1	ko03020
	Plant-pathogen interaction	86	1146	0.806583	1	ko04626
	Phenylalanine, tyrosine and tryptophan biosynthesis	12	181	0.81025	1	ko00400
	Selenocompound metabolism	6	98	0.819608	1	ko00450
	mRNA surveillance pathway	45	625	0.828747	1	ko03015
	Ribosome biogenesis in eukaryotes	20	297	0.842369	1	ko03008
	C5-Branched dibasic acid metabolism	1	22	0.846036	1	ko00660
	N-Glycan biosynthesis	10	161	0.853764	1	ko00510
	Cysteine and methionine metabolism	25	370	0.86145	1	ko00270
	Nitrogen metabolism	6	106	0.871803	1	ko00910
	RNA degradation	33	482	0.874132	1	ko03018
	Arginine and proline metabolism	14	223	0.877472	1	ko00330
	Base excision repair	9	152	0.879913	1	ko03410
	Pentose phosphate pathway	14	225	0.885	1	ko00030
	Glutathione metabolism	16	255	0.89118	1	ko00480
	Histidine metabolism	7	125	0.891919	1	ko00340
	Ubiquitin mediated proteolysis	38	560	0.900299	1	ko04120
	Biotin metabolism	2	48	0.911316	1	ko00780
	Phagosome	21	335	0.918348	1	ko04145
	Purine metabolism	45	670	0.928593	1	ko00230
	Protein export	8	150	0.928902	1	ko03060
	Aminoacyl-tRNA biosynthesis	16	270	0.932508	1	ko00970
	One carbon pool by folate	1	33	0.939617	1	ko00670
	Monobactam biosynthesis	1	37	0.957041	1	ko00261
	Carbon fixation in photosynthetic organisms	17	300	0.960001	1	ko00710
	Nicotinate and nicotinamide metabolism	11	211	0.96187	1	ko00760
	Arachidonic acid metabolism	6	132	0.96292	1	ko00590
	Alanine, aspartate and glutamate metabolism	9	183	0.966876	1	ko00250
	Autophagy - other	3	82	0.96785	1	ko04136
	SNARE interactions in vesicular transport	3	83	0.969845	1	ko04130
	Proteasome	6	139	0.974194	1	ko03050
	Photosynthesis	4	105	0.975694	1	ko00195
	Lysine degradation	9	194	0.980012	1	ko00310
	Citrate cycle (TCA cycle)	12	245	0.982412	1	ko00020
	Pyrimidine metabolism	32	555	0.98743	1	ko00240
	Tropane, piperidine and pyridine alkaloid biosynthesis	4	120	0.9903	1	ko00960
	Isoquinoline alkaloid biosynthesis	6	159	0.991318	1	ko00950
	Glycine, serine and threonine metabolism	10	236	0.994114	1	ko00260
	Ubiquinone and other terpenoid-quinone biosynthesis	6	166	0.994167	1	ko00130
	2-Oxocarboxylic acid metabolism	24	459	0.994205	1	ko01210
	RNA transport	47	798	0.994256	1	ko03013
	Glyoxylate and dicarboxylate metabolism	13	295	0.996135	1	ko00630
	Biosynthesis of unsaturated fatty acids	1	71	0.997626	1	ko01040
	Ribosome	69	1145	0.997707	1	ko03010
	Nucleotide excision repair	10	263	0.99852	1	ko03420
	Carbon metabolism	54	956	0.99893	1	ko01200
	Mismatch repair	5	175	0.998955	1	ko03430
	Protein processing in endoplasmic reticulum	55	994	0.999483	1	ko04141
	Sulfur metabolism	2	124	0.999688	1	ko00920
	Arginine biosynthesis	13	349	0.999734	1	ko00220
	Spliceosome	36	737	0.999825	1	ko03040
	DNA replication	6	224	0.999832	1	ko03030
	Endocytosis	39	810	0.999937	1	ko04144
	Biosynthesis of amino acids	58	1103	0.999939	1	ko01230
	Oxidative phosphorylation	15	482	0.999999	1	ko00190
	Homologous recombination	5	350	1	1	ko03440

## Sheet: Table S4
Table S4. Differentially expressed WRKY genes in R. glutinosa hairy root treated with H2O2
Gene	Control-vs-H12						Control-vs-H24							Control-vs-H36
	log2Ratio(H12/Control)	Up-Down-Regulation(H12/Control)	q-value(Storey et al. 2003)	p-value	Differential expressed genes			log2Ratio(H24/Control)	Up-Down-Regulation(H24/Control)	q-value(Storey et al. 2003)	p-value	Differential expressed genes			log2Ratio(H36/Control)	Up-Down-Regulation(H36/Control)	q-value(Storey et al. 2003)	p-value	Differential expressed genes
RgWRKY13	0.891325	Up	9.28e-34	5e-35			RgWRKY13	0.633301	Up	8.46e-16	6.39e-17			RgWRKY13	1.25613	Up	2.92e-74	9.76e-76	Yes
RgWRKY22	1.00858	Up	2.92e-11	3.98e-12	Yes		RgWRKY22	0.537401	Up	0.00228781	0.000689033			RgWRKY22	0.829491	Up	1.75e-07	3.9e-08
RgWRKY28	1.03378	Up	1.66e-12	2.08e-13	Yes		RgWRKY28	0.421137	Up	0.0184845	0.00736332			RgWRKY28	0.978767	Up	4.82e-11	7.83e-12
RgWRKY3	-0.558838	Down	8.18e-22	6.44e-23			RgWRKY3	-0.82885	Down	2.16e-42	6.61e-44			RgWRKY3	-1.2674	Down	2.29e-84	6.89e-86	Yes
RgWRKY33	6.18932	Up	2.12e-09	3.31e-10	Yes		RgWRKY33	5.13366	Up	7.03e-05	1.53e-05	Yes		RgWRKY33	5.27466	Up	1.98e-05	5.62e-06	Yes
RgWRKY34	0.679648	Up	7.35e-05	1.93e-05			RgWRKY34	0.807123	Up	1.4e-06	2.36e-07			RgWRKY34	1.06711	Up	6.63e-12	1.02e-12	Yes
RgWRKY35	0.724778	Up	0.0897618	0.0557979			RgWRKY35	2.80674	Up	7.04e-25	3.54e-26	Yes		RgWRKY35	2.24116	Up	1.56e-13	2.15e-14	Yes
RgWRKY37	0.18542	Up	3.59e-06	7.85e-07			RgWRKY37	1.21901	Up	0	0	Yes		RgWRKY37	0.833995	Up	6.01e-133	1.21e-134
RgWRKY9	1.43044	Up	3.04e-23	2.27e-24	Yes		RgWRKY9	0.270435	Up	0.172526	0.1166			RgWRKY9	1.11557	Up	5.45e-13	7.8e-14	Yes

## Sheet: Table S5
Table S5. FPKM values of WRKY genes in 12 tissues of R. glutinosa plants
Gene name	FPKM values													Log2(FPKM)
	L1	L3	L5	S1	S2	S3	SS	HTR	MTR	YB	MaB	MF		L1	L3	L5	S1	S2	S3	SS	HTR	MTR	YB	MaB	MF
RgWRKY19	3.06	4.16	18.67	7.55	16.39	15.03	10.53	10.99	15.48	0.56	0.47	0.53		1.61353	2.05658	4.22265	2.91648	4.03474	3.90977	3.39643	3.45812	3.95233	-0.836501	-1.08927	-0.915936
RgWRKY12	6.62	4.05	11.65	9.25	0	11.87	15.15	11.28	15.98	15.31	8.21	14.38		2.72683	2.01792	3.54226	3.20945	-6.64386	3.56925	3.92125	3.4957	3.9982	3.9364	3.03738	3.84599
RgWRKY3	8.79	8.3	13.68	3	4.12	3.77	12.22	8.67	16.16	3.43	1.2	4.03		3.13586	3.05311	3.774	1.58496	2.04264	1.91456	3.61117	3.11603	4.01436	1.77821	0.263034	2.01078
RgWRKY5	1.34	0.91	3.33	1.44	1.73	2.35	3.2	1.28	4.09	3.22	3.1	4.17		0.422233	-0.136062	1.73552	0.526069	0.790772	1.23266	1.67807	0.356144	2.0321	1.68706	1.63227	2.06005
RgWRKY10	15.09	8.59	6.18	2.03	1.91	5.3	0.25	1.64	0.38	10.06	8.1	6.39		3.91552	3.10266	2.62761	1.02148	0.933573	2.40599	-2	0.713696	-1.39593	3.33056	3.01792	2.67582
RgWRKY35	1.43	1.63	8	0.97	0.39	2.57	0.15	0.23	0.04	6.81	0.04	1.73		0.516015	0.704872	3	-0.0439433	-1.35845	1.36177	-2.73697	-2.12029	-4.64386	2.76765	-4.64386	0.790772
RgWRKY37	0	0	6.12	0	0	0	0	3.23	0	22.78	18.21	14.77		-6.64386	-6.64386	2.61353	-6.64386	-6.64386	-6.64386	-6.64386	1.69153	-6.64386	4.5097	4.18666	3.8846
RgWRKY29	0	0	0.6	0.37	0.38	0.57	0.35	0.12	1.02	0.53	0.04	0.27		-6.64386	-6.64386	-0.736966	-1.4344	-1.39593	-0.810966	-1.51457	-3.05889	0.0285692	-0.915936	-4.64386	-1.88897
RgWRKY33	0.77	0.18	4.37	0.8	0.24	0.28	0	0.31	0.1	0.38	0	0		-0.37707	-2.47393	2.12763	-0.321928	-2.05889	-1.8365	-6.64386	-1.68966	-3.32193	-1.39593	-6.64386	-6.64386
RgWRKY22	3.12	1.69	7.53	14.08	17.93	22.67	16.9	13.12	34.69	2.33	0.62	1.14		1.64155	0.757023	2.91265	3.81558	4.1643	4.50271	4.07895	3.7137	5.11645	1.22033	-0.68966	0.189034
RgWRKY24	6.67	0	53.22	15.27	17.8	24.87	24.68	13.69	77.02	6.14	1.42	3.46		2.73769	-6.64386	5.7339	3.93263	4.15381	4.63633	4.62527	3.77505	6.26716	2.61824	0.505891	1.79077
RgWRKY27	3.84	4.16	25.91	6.91	3.56	6.47	5.99	13.48	6.3	0.03	0	0.28		1.94111	2.05658	4.69544	2.78869	1.83188	2.69377	2.58256	3.75275	2.65535	-5.05889	-6.64386	-1.8365
RgWRKY7	3.21	1.91	18.93	1.02	0.62	1.57	0.34	0.86	1.69	0.38	1.14	0.2		1.68257	0.933573	4.2426	0.0285692	-0.68966	0.650765	-1.55639	-0.217591	0.757023	-1.39593	0.189034	-2.32193
RgWRKY9	0.77	1.06	3.21	1.14	1.7	1.82	1.58	0.92	4	0.73	0.48	0.93		-0.37707	0.0840643	1.68257	0.189034	0.765535	0.863938	0.659925	-0.120294	2	-0.454032	-1.05889	-0.104697
RgWRKY21	3.46	0.96	1.36	3.51	4.79	5.97	7.24	7.77	4.28	4.57	1.03	2.38		1.79077	-0.0588937	0.443607	1.81147	2.26003	2.57773	2.85599	2.95791	2.09761	2.19219	0.0426443	1.25096
RgWRKY20	4.39	4.19	10.62	9.6	17.45	17.6	31.95	16.71	64.03	6.79	2.16	9.32		2.13422	2.06695	3.40871	3.26303	4.12516	4.1375	4.99774	4.06264	6.00068	2.76341	1.11103	3.22033
RgWRKY2	1.08	1.14	2.17	2.35	4.04	3.85	5.41	3.07	5.07	2.59	1.71	3.04		0.111031	0.189034	1.1177	1.23266	2.01436	1.94486	2.43563	1.61824	2.34199	1.37295	0.773996	1.60407
RgWRKY1	8.52	7.11	15.95	13.55	12.39	13.18	9.74	8.69	9.42	2.29	2.64	3.19		3.09085	2.82985	3.99548	3.76022	3.6311	3.72028	3.28392	3.11936	3.23573	1.19535	1.40054	1.67356
RgWRKY6	2.15	1.63	17.86	5.03	7.84	8.46	7.79	5.62	12.11	2.1	1.21	6.8		1.10434	0.704872	4.15866	2.33056	2.97085	3.08066	2.96162	2.49057	3.59813	1.07039	0.275007	2.76553
RgWRKY4	1.47	1.55	8.34	2.11	2.15	1.75	2.31	1.37	4.18	1.02	0.28	2.08		0.555816	0.632268	3.06005	1.07724	1.10434	0.807355	1.20789	0.454176	2.0635	0.0285692	-1.8365	1.05658
RgWRKY30	1.52	2.09	17.24	0.43	1.15	1.22	0.09	0.66	0.63	1.77	0.68	0.73		0.604071	1.0635	4.10769	-1.21759	0.201634	0.286881	-3.47393	-0.599462	-0.666576	0.823749	-0.556393	-0.454032
RgWRKY26	5.02	3.06	7.35	9.29	7.14	8.03	5.41	3.75	3.38	6.25	3.92	5.03		2.32769	1.61353	2.87774	3.21568	2.83592	3.0054	2.43563	1.90689	1.75702	2.64386	1.97085	2.33056
RgWRKY18	2.66	0.83	3.33	0.64	3.61	2.37	0.44	3.03	0.28	3.23	0.36	2.94		1.41143	-0.268817	1.73552	-0.643856	1.852	1.24489	-1.18442	1.59932	-1.8365	1.69153	-1.47393	1.55582
RgWRKY25	12.81	7.72	25.17	0.77	17.69	12.82	17.13	10.87	28.48	10.94	2.35	10.27		3.6792	2.9486	4.65363	-0.37707	4.14486	3.68032	4.09845	3.44228	4.83188	3.45154	1.23266	3.36036
RgWRKY23	0	0	5.3	0.73	1.49	0.77	0	0	0	0	0	0		-6.64386	-6.64386	2.40599	-0.454032	0.575312	-0.37707	-6.64386	-6.64386	-6.64386	-6.64386	-6.64386	-6.64386
RgWRKY11	5.8	3.56	8.52	5.87	6.47	6.91	7.7	6.53	9.82	7.24	3.1	7.35		2.53605	1.83188	3.09085	2.55336	2.69377	2.78869	2.94486	2.70708	3.29572	2.85599	1.63227	2.87774
RgWRKY17	0.74	0.41	0.44	10.48	15.59	12.19	13.47	9.05	0.52	1.24	0.16	1.35		-0.434403	-1.2863	-1.18442	3.38957	3.96255	3.60763	3.75168	3.17792	-0.943416	0.31034	-2.64386	0.432959
RgWRKY32	0.41	0.5	1.74	1.07	1.31	0.98	1.7	1.29	2.36	1.7	1.69	1.8		-1.2863	-1	0.799087	0.0976108	0.389567	-0.0291463	0.765535	0.367371	1.23879	0.765535	0.757023	0.847997
RgWRKY34	0	0.12	12.73	0	0.16	0.51	0	0	0.13	0.17	0	0.27		-6.64386	-3.05889	3.67016	-6.64386	-2.64386	-0.971431	-6.64386	-6.64386	-2.94342	-2.55639	-6.64386	-1.88897
RgWRKY14	1.64	0.61	8.6	4.24	11.85	7.67	10.21	9.37	14.88	6.04	3.25	1.72		0.713696	-0.713119	3.10434	2.08406	3.56682	2.93923	3.35191	3.22805	3.8953	2.59455	1.70044	0.782409
RgWRKY8	7.17	2.73	7.89	9.24	14.22	14.03	18.39	17.65	17	13.59	9.32	10.04		2.84197	1.4489	2.98003	3.20789	3.82985	3.81044	4.20085	4.1416	4.08746	3.76447	3.22033	3.32769
RgWRKY13	0	0	0	0.98	2.31	1.27	0.99	1.1	6.03	0.21	0	0		-6.64386	-6.64386	-6.64386	-0.0291463	1.20789	0.344828	-0.0144996	0.137504	2.59216	-2.25154	-6.64386	-6.64386
RgWRKY36	0.1	0.02	0.75	0.02	0.18	0.75	0.41	1.19	2.05	0.05	1.51	5.62		-3.32193	-5.64386	-0.415037	-5.64386	-2.47393	-0.415037	-1.2863	0.250962	1.03562	-4.32193	0.594549	2.49057
RgWRKY15	0.09	0.04	2.04	0.09	1.16	1.35	0.16	0.24	0.19	0.16	0.02	0.35		-3.47393	-4.64386	1.02857	-3.47393	0.214125	0.432959	-2.64386	-2.05889	-2.39593	-2.64386	-5.64386	-1.51457
RgWRKY28	3.26	0.68	7.62	2.43	3.53	5.28	0.75	1.01	1.14	1.3	0.33	0.44		1.70487	-0.556393	2.92979	1.28096	1.81967	2.40054	-0.415037	0.0143553	0.189034	0.378512	-1.59946	-1.18442
RgWRKY31	1.44	0.04	1.96	0	0.02	0.12	0.04	0.23	0.23	1.02	0	0.08		0.526069	-4.64386	0.970854	-6.64386	-5.64386	-3.05889	-4.64386	-2.12029	-2.12029	0.0285692	-6.64386	-3.64386
RgWRKY16	0.52	0.18	0.16	61.77	21.06	26.07	15.18	9.15	2.88	1.04	0.08	1.27		-0.943416	-2.47393	-2.64386	5.94883	4.39643	4.70432	3.9241	3.19377	1.52607	0.0565835	-3.64386	0.344828

## Sheet: Table S6
Table S6. Expression profiles of enzyme genes involved in acteoside biosynthesis pathway
Gene name	Gene ID	FPKM value
		L1	L3	L5	S1	S2	S3	SS	HTR	MTR	YB	MaB	MF
Rg4CL	CL929.Contig4	5.76	3.51	6.03	3.94	15.23	8	4.45	10.75	1.49	13.68	14.61	3.65
RgALDH	Unigene35591	0.4	0.1	0.01	0.3	0.71	0.68	0.16	0.66	0.01	0.47	0.61	2.05
RgC3H	Unigene9725	69.82	56.52	208.54	51.49	62.96	85.28	54.22	54.2	42.71	100.8	66.38	55.01
RgC4H	CL2673.Contig1	43.66	31.84	164.75	27.44	67.54	56.28	37.88	42.86	44	113.36	86.92	12.92
RgCuAO	Unigene9959	41.6	43.22	161.51	19	24.42	29.24	13	14.89	7.13	14.35	6.97	5.98
RgHCT	Unigene19512	10.79	11.06	29	8.91	28.72	26.83	11.9	27.73	8.74	12.79	11.7	15.2
RgPAL	CL1389.Contig1	36.31	24.12	71.75	4.98	10.35	13.93	2.58	7.73	1.37	34.47	46.65	7.09
RgPPO	Unigene11579	1.13	11.32	77.8	0.06	0.06	0.01	0.11	0.01	0.01	0.1	0.37	0.09
RgTyDC	CL1583.Contig3	11.21	8.66	45.64	9.57	6.18	13.46	2.1	3.16	0.84	15.99	4.2	1.3
RgUGT	CL5641.Contig1	0.12	0.07	0.73	0.03	0.02	0.92	0.01	0.25	0.03	0.44	0.04	0.03
RgUGT	CL592.Contig1	11.36	84.14	44.72	10.27	11	11.27	5.68	2.33	0.42	23.25	14.93	51.47

## Sheet: Table S7
Table S7. Correlation analysis between gene expression levels and acteoside content in twelve tissues of R. glutinosa
	RgWRKY19	RgWRKY12	RgWRKY3	RgWRKY5	RgWRKY10	RgWRKY35	RgWRKY37	RgWRKY29	RgWRKY33	RgWRKY22	RgWRKY24	RgWRKY27	RgWRKY7	RgWRKY9	RgWRKY21	RgWRKY20	RgWRKY2	RgWRKY1	RgWRKY6	RgWRKY4	RgWRKY30	RgWRKY26	RgWRKY18	RgWRKY25	RgWRKY23	RgWRKY11	RgWRKY17	RgWRKY32	RgWRKY34	RgWRKY14	RgWRKY8	RgWRKY13	RgWRKY36	RgWRKY15	RgWRKY28	RgWRKY31	RgWRKY16	Acteoside content
RgWRKY19	1	-0.03	0.53	0.01	-0.61*	0.08	-0.61*	0.60*	0.44	0.74**	0.75**	0.68*	0.46	0.78**	0.35	0.54	0.54	0.85**	0.82**	0.66*	0.43	0.33	0.15	0.70**	0.60*	0.57*	0.47	0.21	0.47	0.79**	0.4	0.54	-0.23	0.72**	0.65*	0.11	0.23	-0.15
RgWRKY12	-0.03	1	0.32	0.72**	-0.21	0.25	0.33	0.53	0.03	0.23	0.4	0.1	0.03	0.29	0.29	0.44	0.43	-0.2	0.3	0.21	0.04	-0.06	-0.15	0.27	-0.09	0.63*	-0.21	0.64*	0.09	0.25	0.48	0.19	0.4	-0.1	-0.15	0.12	-0.14	-0.01
RgWRKY3	0.53	0.32	1	0.22	-0.27	0.07	-0.46	0.44	0.38	0.45	0.76**	0.57*	0.46	0.75**	0.14	0.67*	0.35	0.37	0.62*	0.66*	0.4	-0.33	-0.16	0.81**	0.29	0.61*	-0.18	0.29	0.41	0.52	0.22	0.48	-0.05	0.16	0.18	0.36	-0.33	-0.05
RgWRKY5	0.01	0.72**	0.22	1	-0.17	0.24	0.5	0.59*	0.09	0.16	0.46	-0.04	0.15	0.43	-0.11	0.43	0.46	-0.27	0.45	0.35	0.18	-0.09	-0.07	0.44	0.12	0.58*	-0.32	0.88**	0.23	0.3	0.32	0.27	0.62*	0.13	-0.07	0.09	-0.35	0.19
RgWRKY10	-0.61*	-0.21	-0.27	-0.17	1	0.38	0.38	-0.47	0.12	-0.72**	-0.49	-0.24	0.14	-0.46	-0.51	-0.65*	-0.79**	-0.41	-0.47	-0.21	0.13	-0.14	0.27	-0.29	-0.06	-0.43	-0.62*	-0.5	0.05	-0.73**	-0.67*	-0.60*	-0.09	-0.12	0.09	0.54	-0.46	0.56*
RgWRKY35	0.08	0.25	0.07	0.24	0.38	1	0.41	0.28	0.73**	-0.32	0.13	0.45	0.68**	0.18	-0.27	-0.31	-0.29	0.11	0.35	0.54	0.76**	0.37	0.52	0.24	0.65*	0.29	-0.36	0.1	0.72**	-0.08	-0.26	-0.37	-0.14	0.55	0.58*	0.77**	-0.24	0.87**
RgWRKY37	-0.61*	0.33	-0.46	0.5	0.38	0.41	1	-0.08	-0.03	-0.58*	-0.35	-0.32	-0.05	-0.39	-0.31	-0.39	-0.27	-0.74**	-0.29	-0.21	0.04	-0.12	0.2	-0.29	-0.09	-0.14	-0.49	0.41	0.03	-0.31	-0.08	-0.39	0.36	-0.16	-0.28	0.15	-0.41	0.58*
RgWRKY29	0.60*	0.53	0.44	0.59*	-0.47	0.28	-0.08	1	0.22	0.74**	0.86**	0.26	0.22	0.84**	0.2	0.75**	0.64*	0.36	0.70**	0.55*	0.23	0.27	-0.03	0.70**	0.3	0.83**	0.05	0.66*	0.27	0.73**	0.48	0.73**	0.08	0.39	0.32	0.12	0.11	0
RgWRKY33	0.44	0.03	0.38	0.09	0.12	0.73**	-0.03	0.22	1	-0.13	0.4	0.86**	0.98**	0.44	-0.34	-0.17	-0.27	0.56*	0.67*	0.86**	0.97**	0.37	0.35	0.39	0.94**	0.3	-0.24	0.07	0.97**	0.07	-0.31	-0.23	-0.17	0.71**	0.79**	0.79**	-0.08	0.68*
RgWRKY22	0.74**	0.23	0.45	0.16	-0.72**	-0.32	-0.58*	0.74**	-0.13	1	0.76**	0.18	-0.11	0.72**	0.54	0.88**	0.79**	0.53	0.52	0.25	-0.16	0.14	-0.25	0.57*	0	0.61*	0.47	0.35	-0.1	0.84**	0.66*	0.89**	-0.08	0.2	0.16	-0.29	0.35	-0.59*
RgWRKY24	0.75**	0.4	0.76**	0.46	-0.49	0.13	-0.35	0.86**	0.4	0.76**	1	0.54	0.46	0.98**	0.12	0.82**	0.55	0.53	0.84**	0.75**	0.4	0.05	-0.15	0.84**	0.44	0.78**	-0.04	0.58*	0.45	0.77**	0.39	0.76**	0.03	0.41	0.39	0.24	-0.03	-0.06
RgWRKY27	0.68*	0.1	0.57*	-0.04	-0.24	0.45	-0.32	0.26	0.86**	0.18	0.54	1	0.85**	0.55	0.03	0.09	0	0.70**	0.76**	0.83**	0.83**	0.23	0.25	0.48	0.82**	0.39	0.02	0.09	0.85**	0.34	0	0	-0.18	0.67*	0.69**	0.55	0.01	0.3
RgWRKY7	0.46	0.03	0.46	0.15	0.14	0.68**	-0.05	0.22	0.98**	-0.11	0.46	0.85**	1	0.51	-0.39	-0.11	-0.25	0.52	0.70**	0.89**	0.99**	0.23	0.29	0.47	0.93**	0.29	-0.31	0.1	0.99**	0.09	-0.33	-0.18	-0.11	0.72**	0.77**	0.77**	-0.22	0.67*
RgWRKY9	0.78**	0.29	0.75**	0.43	-0.46	0.18	-0.39	0.84**	0.44	0.72**	0.98**	0.55	0.51	1	0.02	0.76**	0.51	0.57*	0.87**	0.80**	0.47	0.06	-0.1	0.87**	0.51	0.74**	-0.05	0.51	0.5	0.72**	0.27	0.72**	0.04	0.51	0.45	0.23	-0.06	-0.01
RgWRKY21	0.35	0.29	0.14	-0.11	-0.51	-0.27	-0.31	0.2	-0.34	0.54	0.12	0.03	-0.39	0.02	1	0.41	0.67*	0.2	0.07	-0.22	-0.4	0.11	0.14	0.18	-0.29	0.4	0.70**	0.08	-0.35	0.57*	0.86**	0.31	-0.17	-0.05	-0.08	-0.24	0.28	-0.57*
RgWRKY20	0.54	0.44	0.67*	0.43	-0.65*	-0.31	-0.39	0.75**	-0.17	0.88**	0.82**	0.09	-0.11	0.76**	0.41	1	0.81**	0.23	0.5	0.3	-0.16	-0.21	-0.36	0.70**	-0.11	0.70**	0.15	0.59*	-0.1	0.80**	0.66*	0.92**	0.13	-0.02	-0.11	-0.22	0	-0.5
RgWRKY2	0.54	0.43	0.35	0.46	-0.79**	-0.29	-0.27	0.64*	-0.27	0.79**	0.55	0	-0.25	0.51	0.67*	0.81**	1	0.23	0.47	0.14	-0.25	0.08	-0.14	0.54	-0.1	0.68*	0.56*	0.60*	-0.17	0.82**	0.86**	0.68*	0.16	0.13	-0.08	-0.39	0.18	-0.54
RgWRKY1	0.85**	-0.2	0.37	-0.27	-0.41	0.11	-0.74**	0.36	0.56*	0.53	0.53	0.70**	0.52	0.57*	0.2	0.23	0.23	1	0.67*	0.62*	0.47	0.60*	0.1	0.4	0.65*	0.35	0.5	-0.16	0.5	0.44	0.07	0.24	-0.4	0.67*	0.77**	0.21	0.53	-0.11
RgWRKY6	0.82**	0.3	0.62*	0.45	-0.47	0.35	-0.29	0.70**	0.67*	0.52	0.84**	0.76**	0.70**	0.87**	0.07	0.5	0.47	0.67*	1	0.91**	0.68*	0.29	0.19	0.79**	0.76**	0.76**	0.1	0.5	0.74**	0.64*	0.27	0.4	0.16	0.76**	0.65*	0.35	0	0.13
RgWRKY4	0.66*	0.21	0.66*	0.35	-0.21	0.54	-0.21	0.55*	0.86**	0.25	0.75**	0.83**	0.89**	0.80**	-0.22	0.3	0.14	0.62*	0.91**	1	0.87**	0.24	0.18	0.72**	0.87**	0.62*	-0.17	0.36	0.90**	0.4	-0.06	0.2	0.04	0.70**	0.68*	0.59*	-0.11	0.41
RgWRKY30	0.43	0.04	0.4	0.18	0.13	0.76**	0.04	0.23	0.97**	-0.16	0.4	0.83**	0.99**	0.47	-0.4	-0.16	-0.25	0.47	0.68*	0.87**	1	0.25	0.36	0.45	0.94**	0.28	-0.3	0.13	0.99**	0.08	-0.32	-0.23	-0.1	0.75**	0.75**	0.76**	-0.24	0.73**
RgWRKY26	0.33	-0.06	-0.33	-0.09	-0.14	0.37	-0.12	0.27	0.37	0.14	0.05	0.23	0.23	0.06	0.11	-0.21	0.08	0.60*	0.29	0.24	0.25	1	0.29	-0.09	0.47	0.2	0.51	-0.11	0.28	0.07	0.01	-0.15	-0.28	0.53	0.64*	0.16	0.73**	0.15
RgWRKY18	0.15	-0.15	-0.16	-0.07	0.27	0.52	0.2	-0.03	0.35	-0.25	-0.15	0.25	0.29	-0.1	0.14	-0.36	-0.14	0.1	0.19	0.18	0.36	0.29	1	0.2	0.4	0.23	0.08	-0.12	0.33	0.03	0.03	-0.29	0.08	0.55	0.48	0.49	-0.2	0.42
RgWRKY25	0.70**	0.27	0.81**	0.44	-0.29	0.24	-0.29	0.70**	0.39	0.57*	0.84**	0.48	0.47	0.87**	0.18	0.70**	0.54	0.4	0.79**	0.72**	0.45	-0.09	0.2	1	0.45	0.81**	-0.04	0.48	0.47	0.73**	0.39	0.60*	0.05	0.51	0.41	0.4	-0.36	0.08
RgWRKY23	0.60*	-0.09	0.29	0.12	-0.06	0.65*	-0.09	0.3	0.94**	0	0.44	0.82**	0.93**	0.51	-0.29	-0.11	-0.1	0.65*	0.76**	0.87**	0.94**	0.47	0.4	0.45	1	0.31	-0.03	0.13	0.95**	0.22	-0.21	-0.13	-0.15	0.87**	0.85**	0.62*	0	0.60*
RgWRKY11	0.57*	0.63*	0.61*	0.58*	-0.43	0.29	-0.14	0.83**	0.3	0.61*	0.78**	0.39	0.29	0.74**	0.4	0.70**	0.68*	0.35	0.76**	0.62*	0.28	0.2	0.23	0.81**	0.31	1	0.09	0.61*	0.34	0.70**	0.58*	0.57*	0.24	0.38	0.31	0.3	-0.03	-0.05
RgWRKY17	0.47	-0.21	-0.18	-0.32	-0.62*	-0.36	-0.49	0.05	-0.24	0.47	-0.04	0.02	-0.31	-0.05	0.70**	0.15	0.56*	0.5	0.1	-0.17	-0.3	0.51	0.08	-0.04	-0.03	0.09	1	-0.13	-0.25	0.43	0.54	0.15	-0.3	0.21	0.14	-0.46	0.67*	-0.56*
RgWRKY32	0.21	0.64*	0.29	0.88**	-0.5	0.1	0.41	0.66*	0.07	0.35	0.58*	0.09	0.1	0.51	0.08	0.59*	0.60*	-0.16	0.5	0.36	0.13	-0.11	-0.12	0.48	0.13	0.61*	-0.13	1	0.2	0.59*	0.55	0.49	0.48	0.09	-0.15	-0.05	-0.21	0.07
RgWRKY34	0.47	0.09	0.41	0.23	0.05	0.72**	0.03	0.27	0.97**	-0.1	0.45	0.85**	0.99**	0.5	-0.35	-0.1	-0.17	0.5	0.74**	0.90**	0.99**	0.28	0.33	0.47	0.95**	0.34	-0.25	0.2	1	0.14	-0.25	-0.19	-0.05	0.76**	0.75**	0.72**	-0.2	0.68*
RgWRKY14	0.79**	0.25	0.52	0.3	-0.73**	-0.08	-0.31	0.73**	0.07	0.84**	0.77**	0.34	0.09	0.72**	0.57*	0.80**	0.82**	0.44	0.64*	0.4	0.08	0.07	0.03	0.73**	0.22	0.70**	0.43	0.59*	0.14	1	0.80**	0.78**	-0.12	0.35	0.2	-0.06	0.08	-0.27
RgWRKY8	0.4	0.48	0.22	0.32	-0.67*	-0.26	-0.08	0.48	-0.31	0.66*	0.39	0	-0.33	0.27	0.86**	0.66*	0.86**	0.07	0.27	-0.06	-0.32	0.01	0.03	0.39	-0.21	0.58*	0.54	0.55	-0.25	0.80**	1	0.56*	0.07	0	-0.16	-0.28	0.12	-0.48
RgWRKY13	0.54	0.19	0.48	0.27	-0.60*	-0.37	-0.39	0.73**	-0.23	0.89**	0.76**	0	-0.18	0.72**	0.31	0.92**	0.68*	0.24	0.4	0.2	-0.23	-0.15	-0.29	0.60*	-0.13	0.57*	0.15	0.49	-0.19	0.78**	0.56*	1	0.06	-0.02	-0.08	-0.28	0.1	-0.49
RgWRKY36	-0.23	0.4	-0.05	0.62*	-0.09	-0.14	0.36	0.08	-0.17	-0.08	0.03	-0.18	-0.11	0.04	-0.17	0.13	0.16	-0.4	0.16	0.04	-0.1	-0.28	0.08	0.05	-0.15	0.24	-0.3	0.48	-0.05	-0.12	0.07	0.06	1	-0.06	-0.3	-0.22	-0.29	-0.14
RgWRKY15	0.72**	-0.1	0.16	0.13	-0.12	0.55	-0.16	0.39	0.71**	0.2	0.41	0.67*	0.72**	0.51	-0.05	-0.02	0.13	0.67*	0.76**	0.70**	0.75**	0.53	0.55	0.51	0.87**	0.38	0.21	0.09	0.76**	0.35	0	-0.02	-0.06	1	0.90**	0.43	0.02	0.39
RgWRKY28	0.65*	-0.15	0.18	-0.07	0.09	0.58*	-0.28	0.32	0.79**	0.16	0.39	0.69**	0.77**	0.45	-0.08	-0.11	-0.08	0.77**	0.65*	0.68*	0.75**	0.64*	0.48	0.41	0.85**	0.31	0.14	-0.15	0.75**	0.2	-0.16	-0.08	-0.3	0.90**	1	0.62*	0.15	0.41
RgWRKY31	0.11	0.12	0.36	0.09	0.54	0.77**	0.15	0.12	0.79**	-0.29	0.24	0.55	0.77**	0.23	-0.24	-0.22	-0.39	0.21	0.35	0.59*	0.76**	0.16	0.49	0.4	0.62*	0.3	-0.46	-0.05	0.72**	-0.06	-0.28	-0.28	-0.22	0.43	0.62*	1	-0.38	0.75**
RgWRKY16	0.23	-0.14	-0.33	-0.35	-0.46	-0.24	-0.41	0.11	-0.08	0.35	-0.03	0.01	-0.22	-0.06	0.28	0	0.18	0.53	0	-0.11	-0.24	0.73**	-0.2	-0.36	0	-0.03	0.67*	-0.21	-0.2	0.08	0.12	0.1	-0.29	0.02	0.15	-0.38	1	-0.42
Acteoside content	-0.15	-0.01	-0.05	0.19	0.56*	0.87**	0.58*	0	0.68*	-0.59*	-0.06	0.3	0.67*	-0.01	-0.57*	-0.5	-0.54	-0.11	0.13	0.41	0.73**	0.15	0.42	0.08	0.60*	-0.05	-0.56*	0.07	0.68*	-0.27	-0.48	-0.49	-0.14	0.39	0.41	0.75**	-0.42	1
Asterisks indicate that the correlationship between FPKM values and acteoside content in 12 tissues of R. glutinosa was significant at 5% level (*) and 1% level (**)

## Sheet: Table S8
Table S8. Correlation analysis between gene expression levels and acteoside content in hairy roots of R. glutinosa under SA treatment
	RgWRKY37	RgWRKY35	RgWRKY3	RgWRKY19	RgWRKY24	RgWRKY25	RgWRKY26	RgWRKY10	RgWRKY8	RgWRKY20	RgWRKY12	RgWRKY2	RgWRKY28	RgWRKY11	RgWRKY27	RgWRKY1	RgWRKY5	RgWRKY7	RgWRKY30	RgWRKY34	RgWRKY21	RgWRKY22	RgWRKY4	RgWRKY6	RgWRKY23	RgWRKY15	RgWRKY17	RgWRKY32	RgWRKY14	RgWRKY13	RgWRKY18	RgWRKY29	RgWRKY9	RgWRKY33	RgWRKY36	RgWRKY16	RgWRKY31	Acteoside
RgWRKY37	1	1.00**	-0.85	0.02	0.75	-0.99*	0.99*	0.81	-0.46	0.92	0.95*	0.78	-0.26	0.99*	0.67	0.64	1.00**	0.15	-0.59	-0.09	0.17	1.00**	0.75	0.43	0.4	0.94	0	0.77	0.93	0.92	0.88	0.23	0.39	-0.96*	-0.92	0.95*	-0.58	1.00**
RgWRKY35	1.00**	1	-0.81	-0.04	0.79	-0.98*	0.98*	0.85	-0.52	0.89	0.93	0.74	-0.2	0.97*	0.71	0.6	0.99**	0.21	-0.64	-0.02	0.1	1.00**	0.79	0.49	0.46	0.96*	0	0.73	0.95*	0.89	0.85	0.29	0.45	-0.97*	-0.89	0.97*	-0.53	1.00**
RgWRKY3	-0.85	-0.81	1	-0.55	-0.29	0.92	-0.91	-0.38	-0.08	-0.99*	-0.97*	-0.99**	0.73	-0.92	-0.17	-0.95*	-0.88	0.4	0.07	0.6	-0.67	-0.85	-0.28	0.11	0.14	-0.62	0	-0.99**	-0.59	-0.99*	-1.00**	0.32	0.16	0.66	0.99*	-0.64	0.93	-0.83
RgWRKY19	0.02	-0.04	-0.55	1	-0.64	-0.18	0.16	-0.57	0.88	0.42	0.32	0.65	-0.97*	0.19	-0.73	0.78	0.1	-0.98*	0.8	-1.00**	0.99*	0.03	-0.65	-0.89	-0.9	-0.31	0	0.65	-0.34	0.42	0.5	-0.97*	-0.91	0.26	-0.41	-0.29	-0.82	0
RgWRKY24	0.75	0.79	-0.29	-0.64	1	-0.64	0.65	1.00**	-0.93	0.43	0.52	0.17	0.44	0.64	0.99**	-0.02	0.7	0.76	-0.97*	0.59	-0.52	0.75	1.00**	0.92	0.91	0.93	0	0.16	0.94	0.43	0.35	0.81	0.9	-0.91	-0.44	0.92	0.09	0.77
RgWRKY25	-0.99*	-0.98*	0.92	-0.18	-0.64	1	-1.00**	-0.71	0.31	-0.97*	-0.99**	-0.87	0.41	-1.00**	-0.54	-0.76	-1.00**	0.01	0.45	0.25	-0.32	-0.99*	-0.63	-0.28	-0.25	-0.88	0	-0.86	-0.86	-0.97*	-0.94	-0.07	-0.24	0.9	0.97*	-0.89	0.71	-0.98*
RgWRKY26	0.99*	0.98*	-0.91	0.16	0.65	-1.00**	1	0.72	-0.33	0.97*	0.99*	0.86	-0.39	1.00**	0.56	0.75	1.00**	0.01	-0.47	-0.23	0.31	0.99**	0.65	0.3	0.27	0.89	0	0.85	0.87	0.96*	0.94	0.09	0.26	-0.91	-0.97*	0.9	-0.69	0.99*
RgWRKY10	0.81	0.85	-0.38	-0.57	1.00**	-0.71	0.72	1	-0.89	0.51	0.6	0.26	0.36	0.7	0.98*	0.08	0.77	0.7	-0.95*	0.51	-0.44	0.81	1.00**	0.88	0.86	0.96*	0	0.25	0.97*	0.51	0.43	0.76	0.86	-0.94	-0.52	0.95*	0	0.83
RgWRKY8	-0.46	-0.52	-0.08	0.88	-0.93	0.31	-0.33	-0.89	1	-0.07	-0.18	0.2	-0.74	-0.31	-0.97*	0.38	-0.39	-0.95	0.99*	-0.84	0.8	-0.45	-0.93	-1.00**	-1.00**	-0.73	0	0.21	-0.75	-0.07	0.02	-0.97*	-1.00**	0.7	0.08	-0.71	-0.45	-0.49
RgWRKY20	0.92	0.89	-0.99*	0.42	0.43	-0.97*	0.97*	0.51	-0.07	1	0.99**	0.96*	-0.62	0.97*	0.32	0.89	0.95	-0.25	-0.22	-0.47	0.54	0.92	0.43	0.04	0.01	0.74	0	0.96*	0.71	1.00**	1.00**	-0.17	0	-0.77	-1.00**	0.75	-0.86	0.91
RgWRKY12	0.95*	0.93	-0.97*	0.32	0.52	-0.99**	0.99*	0.6	-0.18	0.99**	1	0.93	-0.53	0.99**	0.42	0.84	0.97*	-0.15	-0.32	-0.38	0.45	0.96*	0.52	0.14	0.11	0.8	0	0.93	0.78	0.99**	0.98*	-0.07	0.1	-0.83	-1.00**	0.82	-0.8	0.95
RgWRKY2	0.78	0.74	-0.99**	0.65	0.17	-0.87	0.86	0.26	0.2	0.96*	0.93	1	-0.81	0.87	0.05	0.98*	0.82	-0.5	0.05	-0.69	0.75	0.78	0.17	-0.23	-0.26	0.53	0	1.00**	0.5	0.96*	0.98*	-0.43	-0.27	-0.57	-0.96*	0.55	-0.96*	0.76
RgWRKY28	-0.26	-0.2	0.73	-0.97*	0.44	0.41	-0.39	0.36	-0.74	-0.62	-0.53	-0.81	1	-0.41	0.54	-0.91	-0.33	0.92	-0.63	0.98*	-1.00**	-0.27	0.45	0.76	0.78	0.07	0	-0.81	0.11	-0.62	-0.69	0.88	0.79	-0.03	0.62	0.05	0.93	-0.23
RgWRKY11	0.99*	0.97*	-0.92	0.19	0.64	-1.00**	1.00**	0.7	-0.31	0.97*	0.99**	0.87	-0.41	1	0.54	0.76	1.00**	-0.01	-0.45	-0.25	0.33	0.99*	0.63	0.28	0.25	0.88	0	0.86	0.86	0.97*	0.95	0.07	0.24	-0.9	-0.97*	0.89	-0.71	0.98*
RgWRKY27	0.67	0.71	-0.17	-0.73	0.99**	-0.54	0.56	0.98*	-0.97*	0.32	0.42	0.05	0.54	0.54	1	-0.14	0.61	0.84	-0.99**	0.68	-0.62	0.66	0.99**	0.96*	0.95*	0.88	0	0.04	0.89	0.32	0.23	0.88	0.95	-0.85	-0.33	0.87	0.21	0.69
RgWRKY1	0.64	0.6	-0.95*	0.78	-0.02	-0.76	0.75	0.08	0.38	0.89	0.84	0.98*	-0.91	0.76	-0.14	1	0.7	-0.66	0.24	-0.82	0.86	0.65	-0.02	-0.41	-0.44	0.36	0	0.98*	0.32	0.9	0.93	-0.6	-0.45	-0.4	-0.89	0.38	-1.00**	0.62
RgWRKY5	1.00**	0.99**	-0.88	0.1	0.7	-1.00**	1.00**	0.77	-0.39	0.95	0.97*	0.82	-0.33	1.00**	0.61	0.7	1	0.08	-0.53	-0.16	0.24	1.00**	0.7	0.36	0.34	0.92	0	0.82	0.9	0.94	0.91	0.16	0.33	-0.93	-0.95	0.93	-0.64	0.99**
RgWRKY7	0.15	0.21	0.4	-0.98*	0.76	0.01	0.01	0.7	-0.95	-0.25	-0.15	-0.5	0.92	-0.01	0.84	-0.66	0.08	1	-0.89	0.97*	-0.95	0.14	0.77	0.96*	0.97*	0.47	0	-0.51	0.5	-0.26	-0.34	1.00**	0.97*	-0.43	0.25	0.45	0.71	0.18
RgWRKY30	-0.59	-0.64	0.07	0.8	-0.97*	0.45	-0.47	-0.95*	0.99*	-0.22	-0.32	0.05	-0.63	-0.45	-0.99**	0.24	-0.53	-0.89	1	-0.75	0.7	-0.58	-0.98*	-0.98*	-0.98*	-0.82	0	0.06	-0.84	-0.22	-0.13	-0.92	-0.98*	0.8	0.23	-0.81	-0.31	-0.61
RgWRKY34	-0.09	-0.02	0.6	-1.00**	0.59	0.25	-0.23	0.51	-0.84	-0.47	-0.38	-0.69	0.98*	-0.25	0.68	-0.82	-0.16	0.97*	-0.75	1	-1.00**	-0.1	0.59	0.86	0.88	0.25	0	-0.7	0.28	-0.48	-0.55	0.95	0.88	-0.2	0.47	0.22	0.86	-0.06
RgWRKY21	0.17	0.1	-0.67	0.99*	-0.52	-0.32	0.31	-0.44	0.8	0.54	0.45	0.75	-1.00**	0.33	-0.62	0.86	0.24	-0.95	0.7	-1.00**	1	0.18	-0.53	-0.82	-0.83	-0.17	0	0.76	-0.2	0.55	0.62	-0.92	-0.84	0.12	-0.54	-0.14	-0.9	0.14
RgWRKY22	1.00**	1.00**	-0.85	0.03	0.75	-0.99*	0.99**	0.81	-0.45	0.92	0.96*	0.78	-0.27	0.99*	0.66	0.65	1.00**	0.14	-0.58	-0.1	0.18	1	0.74	0.42	0.4	0.94	0	0.78	0.93	0.92	0.88	0.22	0.39	-0.96*	-0.92	0.95	-0.59	1.00**
RgWRKY4	0.75	0.79	-0.28	-0.65	1.00**	-0.63	0.65	1.00**	-0.93	0.43	0.52	0.17	0.45	0.63	0.99**	-0.02	0.7	0.77	-0.98*	0.59	-0.53	0.74	1	0.92	0.91	0.93	0	0.16	0.94	0.42	0.34	0.82	0.9	-0.91	-0.43	0.92	0.1	0.77
RgWRKY6	0.43	0.49	0.11	-0.89	0.92	-0.28	0.3	0.88	-1.00**	0.04	0.14	-0.23	0.76	0.28	0.96*	-0.41	0.36	0.96*	-0.98*	0.86	-0.82	0.42	0.92	1	1.00**	0.7	0	-0.24	0.73	0.04	-0.05	0.98*	1.00**	-0.67	-0.04	0.69	0.48	0.46
RgWRKY23	0.4	0.46	0.14	-0.9	0.91	-0.25	0.27	0.86	-1.00**	0.01	0.11	-0.26	0.78	0.25	0.95*	-0.44	0.34	0.97*	-0.98*	0.88	-0.83	0.4	0.91	1.00**	1	0.68	0	-0.27	0.71	0.01	-0.08	0.98*	1.00**	-0.65	-0.02	0.67	0.51	0.43
RgWRKY15	0.94	0.96*	-0.62	-0.31	0.93	-0.88	0.89	0.96*	-0.73	0.74	0.8	0.53	0.07	0.88	0.88	0.36	0.92	0.47	-0.82	0.25	-0.17	0.94	0.93	0.7	0.68	1	0	0.52	1.00**	0.74	0.67	0.54	0.67	-1.00**	-0.74	1.00**	-0.29	0.95*
RgWRKY17	0	0	0	0	0	0	0	0	0	0	0	0	0	0	0	0	0	0	0	0	0	0	0	0	0	0	1	0	0	0	0	0	0	0	0	0	0	0
RgWRKY32	0.77	0.73	-0.99**	0.65	0.16	-0.86	0.85	0.25	0.21	0.96*	0.93	1.00**	-0.81	0.86	0.04	0.98*	0.82	-0.51	0.06	-0.7	0.76	0.78	0.16	-0.24	-0.27	0.52	0	1	0.49	0.96*	0.98*	-0.44	-0.28	-0.56	-0.96*	0.54	-0.97*	0.75
RgWRKY14	0.93	0.95*	-0.59	-0.34	0.94	-0.86	0.87	0.97*	-0.75	0.71	0.78	0.5	0.11	0.86	0.89	0.32	0.9	0.5	-0.84	0.28	-0.2	0.93	0.94	0.73	0.71	1.00**	0	0.49	1	0.71	0.65	0.57	0.7	-1.00**	-0.71	1.00**	-0.25	0.94
RgWRKY13	0.92	0.89	-0.99*	0.42	0.43	-0.97*	0.96*	0.51	-0.07	1.00**	0.99**	0.96*	-0.62	0.97*	0.32	0.9	0.94	-0.26	-0.22	-0.48	0.55	0.92	0.42	0.04	0.01	0.74	0	0.96*	0.71	1	1.00**	-0.18	0	-0.76	-1.00**	0.75	-0.86	0.91
RgWRKY18	0.88	0.85	-1.00**	0.5	0.35	-0.94	0.94	0.43	0.02	1.00**	0.98*	0.98*	-0.69	0.95	0.23	0.93	0.91	-0.34	-0.13	-0.55	0.62	0.88	0.34	-0.05	-0.08	0.67	0	0.98*	0.65	1.00**	1	-0.26	-0.09	-0.71	-1.00**	0.69	-0.9	0.87
RgWRKY29	0.23	0.29	0.32	-0.97*	0.81	-0.07	0.09	0.76	-0.97*	-0.17	-0.07	-0.43	0.88	0.07	0.88	-0.6	0.16	1.00**	-0.92	0.95	-0.92	0.22	0.82	0.98*	0.98*	0.54	0	-0.44	0.57	-0.18	-0.26	1	0.99*	-0.5	0.17	0.52	0.65	0.26
RgWRKY9	0.39	0.45	0.16	-0.91	0.9	-0.24	0.26	0.86	-1.00**	0	0.1	-0.27	0.79	0.24	0.95	-0.45	0.33	0.97*	-0.98*	0.88	-0.84	0.39	0.9	1.00**	1.00**	0.67	0	-0.28	0.7	0	-0.09	0.99*	1	-0.64	0	0.66	0.52	0.42
RgWRKY33	-0.96*	-0.97*	0.66	0.26	-0.91	0.9	-0.91	-0.94	0.7	-0.77	-0.83	-0.57	-0.03	-0.9	-0.85	-0.4	-0.93	-0.43	0.8	-0.2	0.12	-0.96*	-0.91	-0.67	-0.65	-1.00**	0	-0.56	-1.00**	-0.76	-0.71	-0.5	-0.64	1	0.77	-1.00**	0.33	-0.97*
RgWRKY36	-0.92	-0.89	0.99*	-0.41	-0.44	0.97*	-0.97*	-0.52	0.08	-1.00**	-1.00**	-0.96*	0.62	-0.97*	-0.33	-0.89	-0.95	0.25	0.23	0.47	-0.54	-0.92	-0.43	-0.04	-0.02	-0.74	0	-0.96*	-0.71	-1.00**	-1.00**	0.17	0	0.77	1	-0.76	0.85	-0.91
RgWRKY16	0.95*	0.97*	-0.64	-0.29	0.92	-0.89	0.9	0.95*	-0.71	0.75	0.82	0.55	0.05	0.89	0.87	0.38	0.93	0.45	-0.81	0.22	-0.14	0.95	0.92	0.69	0.67	1.00**	0	0.54	1.00**	0.75	0.69	0.52	0.66	-1.00**	-0.76	1	-0.31	0.96*
RgWRKY31	-0.58	-0.53	0.93	-0.82	0.09	0.71	-0.69	0	-0.45	-0.86	-0.8	-0.96*	0.93	-0.71	0.21	-1.00**	-0.64	0.71	-0.31	0.86	-0.9	-0.59	0.1	0.48	0.51	-0.29	0	-0.97*	-0.25	-0.86	-0.9	0.65	0.52	0.33	0.85	-0.31	1	-0.56
Acteoside	1.00**	1.00**	-0.83	0	0.77	-0.98*	0.99*	0.83	-0.49	0.91	0.95	0.76	-0.23	0.98*	0.69	0.62	0.99**	0.18	-0.61	-0.06	0.14	1.00**	0.77	0.46	0.43	0.95*	0	0.75	0.94	0.91	0.87	0.26	0.42	-0.97*	-0.91	0.96*	-0.56	1
Asterisks indicate that the correlationship between FPKM values and acteoside content in 12 tissues of R. glutinosa was significant at 5% level (*) and 1% level (**)

## Sheet: Table S9
Table S9. Correlation analysis between gene expression levels and acteoside content in hairy roots of R. glutinosa under H2O2 treatment
	RgWRKY1	RgWRKY2	RgWRKY3	RgWRKY4	RgWRKY5	RgWRKY6	RgWRKY7	RgWRKY8	RgWRKY9	RgWRKY10	RgWRKY11	RgWRKY12	RgWRKY13	RgWRKY14	RgWRKY15	RgWRKY16	RgWRKY17	RgWRKY18	RgWRKY19	RgWRKY20	RgWRKY21	RgWRKY22	RgWRKY23	RgWRKY24	RgWRKY25	RgWRKY26	RgWRKY27	RgWRKY28	RgWRKY29	RgWRKY30	RgWRKY31	RgWRKY32	RgWRKY33	RgWRKY34	RgWRKY35	RgWRKY36	RgWRKY37	Acteoside
RgWRKY1	1	-0.22	-0.52	0.42	0.81	-0.73	0.42	0.77	0.14	0.31	0.95*	0.97**	0.21	-0.11	-0.08	-0.95*	0.22	-0.56	-0.84	0.34	0.92*	0.42	0.03	0.73	-0.39	0.79	0.34	0.23	-0.06	0.35	-0.48	-0.16	0.57	0.47	0.7	0.89*	0.72	0.17
RgWRKY2	-0.22	1	0.02	-0.67	-0.32	0.63	-0.93*	0.11	-0.82	-0.55	-0.16	-0.04	-0.25	0.90*	0.77	0.33	-1.00**	0.72	0.71	0.69	-0.11	-0.74	-0.5	-0.38	0.08	0.26	0.49	-0.66	0.66	-0.82	-0.75	0.1	-0.84	-0.05	0.44	-0.59	0.44	0.59
RgWRKY3	-0.52	0.02	1	-0.74	-0.89*	0.75	-0.38	0.06	-0.48	-0.8	-0.24	-0.66	-0.90*	0.34	0.5	0.23	0.04	0.71	0.31	0.18	-0.17	-0.69	-0.7	-0.91*	-0.58	-0.11	0.39	-0.69	-0.66	-0.58	0.38	-0.75	-0.54	-1.00**	-0.74	-0.59	-0.72	-0.78
RgWRKY4	0.42	-0.67	-0.74	1	0.82	-0.92*	0.88*	-0.24	0.93*	0.98**	0.16	0.41	0.87	-0.87	-0.92*	-0.27	0.62	-0.98**	-0.61	-0.68	0.07	1.00**	0.90*	0.88*	0.47	-0.21	-0.71	0.98**	0.09	0.97**	0.29	0.56	0.93*	0.77	0.18	0.75	0.17	0.2
RgWRKY5	0.81	-0.32	-0.89*	0.82	1	-0.94*	0.63	0.25	0.56	0.78	0.58	0.85	0.75	-0.47	-0.53	-0.61	0.28	-0.86	-0.71	-0.13	0.52	0.79	0.59	0.99**	0.21	0.34	-0.23	0.7	0.28	0.71	-0.29	0.42	0.78	0.87	0.69	0.89*	0.68	0.47
RgWRKY6	-0.73	0.63	0.75	-0.92*	-0.94*	1	-0.86	-0.15	-0.76	-0.86	-0.52	-0.71	-0.72	0.72	0.73	0.61	-0.59	0.97**	0.83	0.37	-0.44	-0.92*	-0.68	-0.95*	-0.17	-0.17	0.38	-0.83	0	-0.89*	-0.04	-0.33	-0.95*	-0.75	-0.4	-0.94*	-0.4	-0.18
RgWRKY7	0.42	-0.93*	-0.38	0.88*	0.63	-0.86	1	-0.08	0.91*	0.79	0.27	0.31	0.54	-0.94*	-0.87	-0.42	0.91*	-0.92*	-0.79	-0.68	0.2	0.92*	0.69	0.68	0.1	-0.16	-0.56	0.85	-0.39	0.96*	0.54	0.15	0.98**	0.4	-0.12	0.78	-0.13	-0.27
RgWRKY8	0.77	0.11	0.06	-0.24	0.25	-0.15	-0.08	1	-0.45	-0.37	0.92*	0.7	-0.44	0.41	0.52	-0.86	-0.06	0.06	-0.55	0.78	0.95*	-0.22	-0.61	0.13	-0.83	0.97**	0.85	-0.43	-0.28	-0.26	-0.58	-0.67	0.02	-0.13	0.5	0.46	0.53	-0.12
RgWRKY9	0.14	-0.82	-0.48	0.93*	0.56	-0.76	0.91*	-0.45	1	0.91*	-0.09	0.08	0.75	-0.98**	-1.00**	-0.06	0.77	-0.89*	-0.49	-0.88*	-0.17	0.95*	0.91*	0.65	0.49	-0.49	-0.85	0.96**	-0.12	0.97**	0.61	0.49	0.88*	0.53	-0.18	0.56	-0.2	-0.07
RgWRKY10	0.31	-0.55	-0.8	0.98**	0.78	-0.86	0.79	-0.37	0.91*	1	0.02	0.34	0.94*	-0.83	-0.92*	-0.11	0.49	-0.93*	-0.45	-0.7	-0.07	0.96**	0.96**	0.86	0.63	-0.31	-0.78	0.99**	0.25	0.93*	0.25	0.71	0.84	0.83	0.21	0.63	0.19	0.34
RgWRKY11	0.95*	-0.16	-0.24	0.16	0.58	-0.52	0.27	0.92*	-0.09	0.02	1	0.88*	-0.1	0.07	0.16	-0.99**	0.19	-0.33	-0.8	0.52	1.00**	0.17	-0.26	0.49	-0.65	0.90*	0.58	-0.04	-0.25	0.13	-0.48	-0.46	0.39	0.17	0.58	0.77	0.6	-0.04
RgWRKY12	0.97**	-0.04	-0.66	0.41	0.85	-0.71	0.31	0.7	0.08	0.34	0.88*	1	0.32	-0.02	-0.04	-0.85	0.03	-0.53	-0.71	0.39	0.85	0.39	0.08	0.78	-0.23	0.78	0.32	0.24	0.18	0.3	-0.62	0.01	0.48	0.61	0.85	0.83	0.86	0.4
RgWRKY13	0.21	-0.25	-0.90*	0.87	0.75	-0.72	0.54	-0.44	0.75	0.94*	-0.1	0.32	1	-0.62	-0.78	0.06	0.18	-0.78	-0.2	-0.58	-0.18	0.82	0.94*	0.82	0.8	-0.32	-0.75	0.89*	0.56	0.75	0.03	0.89*	0.63	0.93*	0.37	0.46	0.35	0.62
RgWRKY14	-0.11	0.90*	0.34	-0.87	-0.47	0.72	-0.94*	0.41	-0.98**	-0.83	0.07	-0.02	-0.62	1	0.97**	0.09	-0.87	0.85	0.53	0.89*	0.15	-0.91*	-0.82	-0.55	-0.36	0.49	0.8	-0.90*	0.29	-0.95*	-0.71	-0.34	-0.88*	-0.38	0.31	-0.55	0.32	0.24
RgWRKY15	-0.08	0.77	0.5	-0.92*	-0.53	0.73	-0.87	0.52	-1.00**	-0.92*	0.16	-0.04	-0.78	0.97**	1	-0.02	-0.72	0.86	0.42	0.91*	0.25	-0.94*	-0.93*	-0.63	-0.56	0.54	0.89*	-0.97**	0.05	-0.96*	-0.61	-0.56	-0.84	-0.55	0.19	-0.5	0.2	0.01
RgWRKY16	-0.95*	0.33	0.23	-0.27	-0.61	0.61	-0.42	-0.86	-0.06	-0.11	-0.99**	-0.85	0.06	0.09	-0.02	1	-0.35	0.44	0.89*	-0.38	-0.97**	-0.29	0.16	-0.53	0.64	-0.82	-0.47	-0.07	0.36	-0.27	0.32	0.46	-0.52	-0.17	-0.48	-0.84	-0.5	0.14
RgWRKY17	0.22	-1.00**	0.04	0.62	0.28	-0.59	0.91*	-0.06	0.77	0.49	0.19	0.03	0.18	-0.87	-0.72	-0.35	1	-0.68	-0.71	-0.65	0.13	0.69	0.43	0.33	-0.14	-0.23	-0.44	0.6	-0.72	0.78	0.75	-0.17	0.81	-0.01	-0.47	0.58	-0.46	-0.64
RgWRKY18	-0.56	0.72	0.71	-0.98**	-0.86	0.97**	-0.92*	0.06	-0.89*	-0.93*	-0.33	-0.53	-0.78	0.85	0.86	0.44	-0.68	1	0.75	0.57	-0.25	-0.99**	-0.81	-0.91*	-0.3	0.05	0.57	-0.93*	0.03	-0.97**	-0.24	-0.42	-0.97**	-0.72	-0.23	-0.86	-0.22	-0.12
RgWRKY19	-0.84	0.71	0.31	-0.61	-0.71	0.83	-0.79	-0.55	-0.49	-0.45	-0.8	-0.71	-0.2	0.53	0.42	0.89*	-0.71	0.75	1	0.08	-0.76	-0.64	-0.22	-0.68	0.4	-0.47	-0.05	-0.46	0.47	-0.65	-0.07	0.26	-0.84	-0.28	-0.23	-0.95*	-0.25	0.27
RgWRKY20	0.34	0.69	0.18	-0.68	-0.13	0.37	-0.68	0.78	-0.88*	-0.7	0.52	0.39	-0.58	0.89*	0.91*	-0.38	-0.65	0.57	0.08	1	0.59	-0.7	-0.83	-0.25	-0.62	0.84	0.96*	-0.8	0.12	-0.76	-0.83	-0.51	-0.57	-0.25	0.53	-0.11	0.55	0.18
RgWRKY21	0.92*	-0.11	-0.17	0.07	0.52	-0.44	0.2	0.95*	-0.17	-0.07	1.00**	0.85	-0.18	0.15	0.25	-0.97**	0.13	-0.25	-0.76	0.59	1	0.08	-0.34	0.41	-0.7	0.93*	0.65	-0.13	-0.26	0.04	-0.51	-0.52	0.31	0.11	0.57	0.71	0.59	-0.06
RgWRKY22	0.42	-0.74	-0.69	1.00**	0.79	-0.92*	0.92*	-0.22	0.95*	0.96**	0.17	0.39	0.82	-0.91*	-0.94*	-0.29	0.69	-0.99**	-0.64	-0.7	0.08	1	0.89*	0.85	0.42	-0.22	-0.7	0.97**	0	0.99**	0.35	0.5	0.95*	0.71	0.12	0.76	0.11	0.11
RgWRKY23	0.03	-0.5	-0.7	0.90*	0.59	-0.68	0.69	-0.61	0.91*	0.96**	-0.26	0.08	0.94*	-0.82	-0.93*	0.16	0.43	-0.81	-0.22	-0.83	-0.34	0.89*	1	0.69	0.79	-0.55	-0.92*	0.97**	0.3	0.86	0.38	0.81	0.71	0.75	0.04	0.4	0.01	0.33
RgWRKY24	0.73	-0.38	-0.91*	0.88*	0.99**	-0.95*	0.68	0.13	0.65	0.86	0.49	0.78	0.82	-0.55	-0.63	-0.53	0.33	-0.91*	-0.68	-0.25	0.41	0.85	0.69	1	0.31	0.22	-0.35	0.79	0.29	0.78	-0.19	0.5	0.82	0.90*	0.62	0.87	0.61	0.46
RgWRKY25	-0.39	0.08	-0.58	0.47	0.21	-0.17	0.1	-0.83	0.49	0.63	-0.65	-0.23	0.8	-0.36	-0.56	0.64	-0.14	-0.3	0.4	-0.62	-0.7	0.42	0.79	0.31	1	-0.69	-0.82	0.6	0.7	0.37	0.14	0.97**	0.13	0.63	0.06	-0.17	0.03	0.62
RgWRKY26	0.79	0.26	-0.11	-0.21	0.34	-0.17	-0.16	0.97**	-0.49	-0.31	0.90*	0.78	-0.32	0.49	0.54	-0.82	-0.23	0.05	-0.47	0.84	0.93*	-0.22	-0.55	0.22	-0.69	1	0.84	-0.4	-0.05	-0.28	-0.75	-0.51	-0.03	0.03	0.68	0.45	0.7	0.11
RgWRKY27	0.34	0.49	0.39	-0.71	-0.23	0.38	-0.56	0.85	-0.85	-0.78	0.58	0.32	-0.75	0.8	0.89*	-0.47	-0.44	0.57	-0.05	0.96*	0.65	-0.7	-0.92*	-0.35	-0.82	0.84	1	-0.83	-0.17	-0.72	-0.64	-0.74	-0.51	-0.45	0.33	-0.07	0.35	-0.12
RgWRKY28	0.23	-0.66	-0.69	0.98**	0.7	-0.83	0.85	-0.43	0.96**	0.99**	-0.04	0.24	0.89*	-0.90*	-0.97**	-0.07	0.6	-0.93*	-0.46	-0.8	-0.13	0.97**	0.97**	0.79	0.6	-0.4	-0.83	1	0.12	0.96**	0.4	0.65	0.87	0.73	0.06	0.6	0.04	0.19
RgWRKY29	-0.06	0.66	-0.66	0.09	0.28	0	-0.39	-0.28	-0.12	0.25	-0.25	0.18	0.56	0.29	0.05	0.36	-0.72	0.03	0.47	0.12	-0.26	0	0.3	0.29	0.7	-0.05	-0.17	0.12	1	-0.12	-0.6	0.78	-0.25	0.66	0.64	-0.18	0.62	0.97**
RgWRKY30	0.35	-0.82	-0.58	0.97**	0.71	-0.89*	0.96*	-0.26	0.97**	0.93*	0.13	0.3	0.75	-0.95*	-0.96*	-0.27	0.78	-0.97**	-0.65	-0.76	0.04	0.99**	0.86	0.78	0.37	-0.28	-0.72	0.96**	-0.12	1	0.47	0.43	0.96**	0.61	-0.01	0.73	-0.03	-0.02
RgWRKY31	-0.48	-0.75	0.38	0.29	-0.29	-0.04	0.54	-0.58	0.61	0.25	-0.48	-0.62	0.03	-0.71	-0.61	0.32	0.75	-0.24	-0.07	-0.83	-0.51	0.35	0.38	-0.19	0.14	-0.75	-0.64	0.4	-0.6	0.47	1	-0.03	0.36	-0.32	-0.89*	-0.08	-0.89*	-0.68
RgWRKY32	-0.16	0.1	-0.75	0.56	0.42	-0.33	0.15	-0.67	0.49	0.71	-0.46	0.01	0.89*	-0.34	-0.56	0.46	-0.17	-0.42	0.26	-0.51	-0.52	0.5	0.81	0.5	0.97**	-0.51	-0.74	0.65	0.78	0.43	-0.03	1	0.22	0.79	0.29	0.01	0.26	0.75
RgWRKY33	0.57	-0.84	-0.54	0.93*	0.78	-0.95*	0.98**	0.02	0.88*	0.84	0.39	0.48	0.63	-0.88*	-0.84	-0.52	0.81	-0.97**	-0.84	-0.57	0.31	0.95*	0.71	0.82	0.13	-0.03	-0.51	0.87	-0.25	0.96**	0.36	0.22	1	0.55	0.09	0.88	0.08	-0.1
RgWRKY34	0.47	-0.05	-1.00**	0.77	0.87	-0.75	0.4	-0.13	0.53	0.83	0.17	0.61	0.93*	-0.38	-0.55	-0.17	-0.01	-0.72	-0.28	-0.25	0.11	0.71	0.75	0.90*	0.63	0.03	-0.45	0.73	0.66	0.61	-0.32	0.79	0.55	1	0.69	0.57	0.67	0.77
RgWRKY35	0.7	0.44	-0.74	0.18	0.69	-0.4	-0.12	0.5	-0.18	0.21	0.58	0.85	0.37	0.31	0.19	-0.48	-0.47	-0.23	-0.23	0.53	0.57	0.12	0.04	0.62	0.06	0.68	0.33	0.06	0.64	-0.01	-0.89*	0.29	0.09	0.69	1	0.45	1.00**	0.79
RgWRKY36	0.89*	-0.59	-0.59	0.75	0.89*	-0.94*	0.78	0.46	0.56	0.63	0.77	0.83	0.46	-0.55	-0.5	-0.84	0.58	-0.86	-0.95*	-0.11	0.71	0.76	0.4	0.87	-0.17	0.45	-0.07	0.6	-0.18	0.73	-0.08	0.01	0.88	0.57	0.45	1	0.46	0.03
RgWRKY37	0.72	0.44	-0.72	0.17	0.68	-0.4	-0.13	0.53	-0.2	0.19	0.6	0.86	0.35	0.32	0.2	-0.5	-0.46	-0.22	-0.25	0.55	0.59	0.11	0.01	0.61	0.03	0.7	0.35	0.04	0.62	-0.03	-0.89*	0.26	0.08	0.67	1.00**	0.46	1	0.77
Acteoside	0.17	0.59	-0.78	0.2	0.47	-0.18	-0.27	-0.12	-0.07	0.34	-0.04	0.4	0.62	0.24	0.01	0.14	-0.64	-0.12	0.27	0.18	-0.06	0.11	0.33	0.46	0.62	0.11	-0.12	0.19	0.97**	-0.02	-0.68	0.75	-0.1	0.77	0.79	0.03	0.77	1
Asterisks indicate that the correlationship between FPKM values and acteoside content in 12 tissues of R. glutinosa was significant at 5% level (*) and 1% level (**)

## Sheet: Table S10
Table S10. Expression profiles of RgWRKY37 and candidate enzyme genes involved in acteoside biosynthesis in transgenic hairy roots
Gene name	Gene ID	WT1 FPKM	WT2 FPKM	WT3 FPKM	OE10 FPKM	OE13 FPKM	OE19 FPKM
Rg4CL	CL1414.Contig2	3.18	4.63	4.51	8.37	9.02	10.21
RgALDH	Unigene35591	34.19	37.03	53.43	44.17	46.22	58.26
RgC3H	Unigene9725	146.36	156.2	132.09	150.49	137.72	135.14
RgC4H	CL2673.Contig4	2.44	2.39	2.47	5.69	4.23	3.92
RgCuAO	Unigene9959	168.9	164.83	144.55	192.86	196.45	256.13
RgHCT	Unigene14097	80.38	66.22	68.01	93.04	117.89	160.91
RgPAL	CL1389.Contig1	90.58	112.04	86.93	77.81	87.96	56.81
RgPPO	Unigene12832	28.9	34.13	32.37	30.07	47.07	41.51
RgTyDC	Unigene9554	2.25	3.71	3.98	6.46	4.32	5.29
RgUGT	CL592.Contig1	0.08	0.39	0.32	0.67	1.41	4.96
RgWRKY37	CL394.Contig2	25.84	31.05	33.85	28.55	50.56	40.01
